# Supplementary material for: CO 2 -enhanced TADF of an ultra-stable Cu( i ) cluster via guest–host π–π interaction
Source: Royal Society of Chemistry journal article supplement (doi:10.1039/d4sc07949c), 2025-01-01
Supplement: d4sc07949c1.pdf [file d4sc07949c1.pdf]

## **CO<sub>2</sub>-Enhanced TADF of an Ultra-Stable Cu(I) Cluster via Guest-Host $\pi$ - $\pi$ Interaction**

Hong-Jin Zhang,<sup>a</sup> Zong-Ren Chen,<sup>a</sup> Ji-Tong Xu,<sup>b</sup> Jia-Wen Ye,<sup>\*,a</sup> Ling Chen<sup>\*,a</sup> and Xiao-Ming Chen.<sup>c</sup>

<sup>a</sup> Jiangmen Key Laboratory of Synthetic Chemistry and Cleaner Production, School of Environmental and Chemical Engineering, Wuyi University, Jiangmen, Guangdong 529000, PR China.

<sup>b</sup> School of Textile Science and Engineering, Wuyi University, Jiangmen, Guangdong 529000, PR China.

<sup>c</sup> MOE Key Laboratory of Bioinorganic and Synthetic Chemistry, GBRCE for Functional Molecular Engineering, School of Chemistry, IGCME, Sun Yat-Sen University, Guangzhou 510275, PR China.

\*Corresponding author. Email: [wyuchemyjw@126.com](mailto:wyuchemyjw@126.com); [wyuchemcling@126.com](mailto:wyuchemcling@126.com).

## 1. Materials and Methods

**General Methods.** All reagents and solvents were commercially available and used without further purification. Elemental analysis (EA) was recorded by a Vario EL cube elemental analyzer. Powder X-ray diffraction (PXRD) patterns were recorded by a Rigaku Mini diffractometer. All of the simulated PXRD patterns were obtained by analyzing the CIF files of SCXRD data using the Mercury software. Room-temperature solid-state UV-vis absorption spectra were recorded on a PerkinElmer Lambda950 UV-vis-NIR absorption spectrometer coupled with an integrating sphere by using BaSO<sub>4</sub> powder as the reflectance reference. Thermogravimetric (TG) analyses were performed by a Netzsch TG209F1 Libra R instrument with a ramping rate of 5.0 °C min<sup>-1</sup> under N<sub>2</sub> atmosphere. Gas sorption isotherms were recorded on with a Bell-Max II instrument, and the measurement temperature was maintained by liquid nitrogen (77 K), dry ice (195 K) and water bath (278 and 298 K). 0.1 M HCl and 0.1 M NaOH aqueous solutions were used to adjust the pH for the sample-immersing experiment, and the pH values was recorded using a pH meter (Mettler-Toledo SD20 Organic Kit, equipped with InLab Science Pro-ISM). Scanning electron microscopy (SEM) was performed by a Zeiss Sigma500 SEM apparatus. The wetting behavior of water on the sample surface was determined using a contact angle meter (HYK-Z-103, Hongjin Instrument Technology). The measurements were performed at 298 K, and the reported contact angles for CuIDPO represent the average values obtained from both edges of the droplet.

**PXRD Patterns of CuIDPO in CO<sub>2</sub>/N<sub>2</sub> Mixtures of Different Ratios (v/v).** PXRD patterns of CuIDPO in CO<sub>2</sub>/N<sub>2</sub> mixtures of different ratios (v/v) were collected by Ultimalv (Rigaku) powder X-ray diffractometer equipped with a rotating anode Cu K $\alpha$  X-ray generator and gas mixing control unit. The target mixture gas was blown into the sample chamber, and the sample was kept in that atmosphere for 5 minutes before collecting the PXRD patterns. After collecting the PXRD pattern, the mixture gas was evacuated using a vacuum pump, and a new target mixture gas was introduced. The PXRD patterns were then collected after the sample was kept in the new atmosphere for another 5 minutes.

**Dynamic adsorption-desorption tests:** Gravimetric measurements were performed using a Waters LLC TGA55 thermogravimetric analyzer under a N<sub>2</sub> atmosphere with or without water vapor (RH 6.4–47.3%). Platinum pans and a gas flow rate of 20 mL·min<sup>-1</sup> were employed. The weight changes during water vapor adsorption and desorption processes were monitored isothermally at 298 K.

**Single-Crystal X-Ray Diffraction.** Diffraction data were collected on a Rigaku XtaLAB single-crystal X-ray diffractometer by using Cu-K $\alpha$  radiation ( $\lambda$  = 1.54184 Å). The structures were solved with the direct methods and refined with the full-matrix least-squares method on  $F^2$  using the SHELXTL package. SHELXT was used for the structure solution of the crystals. All non-hydrogen atoms were refined with anisotropic displacement parameters, and hydrogen atoms were placed in the idealized positions and refined as rigid atoms with

the relative isotropic displacement parameters. Additional crystallographic information is shown in Tables S1 and S2. CCDC 2393520-2393525 contain the supplementary crystallographic data for this paper. These data can be obtained free of charge from the Cambridge Crystallographic Data Centre via [www.ccdc.cam.ac.uk/data\\_request/cif](http://www.ccdc.cam.ac.uk/data_request/cif).

For CuIDPO·CO<sub>2</sub> (291 K), in the host framework, one benzene ring exhibits disorder. The C0 C5 C4 C1 C3 C6 atoms were restrained by "ISOR 0.01". In addition, due to the less than ideal resolution and the disorder of CO<sub>2</sub>, DFIX restraints were applied to keep the bond length (C-O bond 1.2 Å) in reasonable ranges. The occupancy of CO<sub>2</sub> was fixed to 0.4. The geometry and displacement parameter restraints were handled with the "DANG" and "ISOR" commands.

For CuIDPO·CO<sub>2</sub> (150 K), "DIFX" command was used to keep the bond length (C-O bond 1.2 Å) in reasonable ranges. The occupancy of CO<sub>2</sub> was fixed to 0.8. The geometry and displacement parameter restraints were handled with the "DANG" and "ISOR" commands.

**Photoluminescence Measurement.** The emission spectra were recorded by an Ocean QE Pro charge coupled device (CCD) equipped with a 365 nm LED. All instrument parameters such as the excitation split, emission split and scanning speed were fixed during the in-situ measurements. Variable temperature emission spectra and decay curves were obtained by the Edinburgh FLS1000 fluorescence spectrometer equipped with a continuous Xe lamp and an Oxford temperature controller. The luminescence lifetime experiments were performed by the same spectrometer equipped with a variable pulsed laser (VPL) at 375 nm as the excitation source. The experimental data were then fitted according to the following equation.<sup>1</sup>

$$\tau(\text{obs}) = \frac{1 + \frac{1}{3} \exp\left(-\frac{\Delta E_{\text{ST}}}{k_{\text{B}} T}\right)}{\frac{1}{\tau(T_1)} + \frac{1}{3\tau(S_1)} \exp\left(-\frac{\Delta E_{\text{ST}}}{k_{\text{B}} T}\right)} \quad \text{eq (S1)}$$

where  $\tau(\text{obs})$ ,  $\tau(S_1)$ ,  $\tau(T_1)$ ,  $k_{\text{B}}$ ,  $T$  and  $\Delta E_{\text{ST}}$  represent the observed lifetime, singlet state decay lifetime, triplet state decay lifetime, Boltzmann constant, temperature and singlet-triplet energy gap, respectively.

**CO<sub>2</sub> Sensing Property Measurement.** The CO<sub>2</sub> fluorescence sensing properties were measured in situ by placing CuIDPO inside an Oxford variable-temperature device with a four-way valve that connected the sample chamber to a pressure gage, a vacuum pump and a CO<sub>2</sub> cylinder. The pressure of CO<sub>2</sub> was recorded by Sensor PIZA 111. The emission spectra were recorded by an Ocean QE Pro charge coupled device (CCD) equipped with

a 365 nm LED. All instrument parameters such as the excitation split, emission split and scanning speed were fixed during the in-situ measurements.

**Time-Dependent Photoluminescence of CH<sub>3</sub>CN Vapor.** CuIDPO was attached to a quartz slide and placed in a quartz cuvette (1.25 × 1.25 × 4.5 cm<sup>3</sup>) (Fig. S35). The emission spectra without solvent were recorded, then 100 μL CH<sub>3</sub>CN solution were carefully added to the cuvette, and the luminescence spectra were recorded at different times. The emission spectra were recorded by an Ocean QE Pro charge coupled device (CCD) equipped with a 365 nm LED. All instrument parameters such as the excitation split, emission split and scanning speed were fixed during the in-situ measurements.

**Preparation of CuIDPO·CH<sub>2</sub>Cl<sub>2</sub>.** CuI (0.038 g, 0.20 mmol) and DPO (bis(2-diphenylphosphinophenyl)ether, 0.108 g, 0.20 mmol) were mixed with 10 mL CH<sub>2</sub>Cl<sub>2</sub> in a 25 mL glass bottle reactor. Then they were mixed adequately by 3 min ultrasonic dissolving and stood to get clear solution. The transparent crystals were collected after 24 h. At last, they were washed with CH<sub>2</sub>Cl<sub>2</sub> for three times (yield 60%). Elemental analysis calcd (%) for C<sub>72</sub>H<sub>56</sub>Cu<sub>2</sub>I<sub>2</sub>O<sub>2</sub>P<sub>4</sub>: C 59.31, H 3.87; found: C 59.68, H 4.19.

**Preparation of CuIDPO.** The CuIDPO·CH<sub>2</sub>Cl<sub>2</sub> was dried under vacuum at room temperature for 4 h to get the guest-free CuIDPO single crystals.

**Preparation of CuIDPO@GF.** Firstly, CuI (0.019 g, 0.10 mmol) was dissolved in CH<sub>3</sub>CN (5 mL), and then sprayed on the glass fiber (GF) paper, and dried in the air. Secondly, dry GF paper with CuI were immersed in a CH<sub>2</sub>Cl<sub>2</sub> solution of DPO (0.054 g, 0.10 mmol). The DPO was reacted with CuI to form CuIDPO·CH<sub>2</sub>Cl<sub>2</sub> powder inside the GF paper. At last, after washing the GF paper 3 times with CH<sub>2</sub>Cl<sub>2</sub>, a vacuum pump was used to remove the CH<sub>2</sub>Cl<sub>2</sub> from the paper.

**Density Functional Theory (DFT) Calculations.** DFT calculations were performed using Gaussian 09 program.<sup>2</sup> Geometry optimizations were performed using the PBE0 density functional with D3 dispersion correction.<sup>3</sup> The 6-31G(d) basis set was used for C, O, P and H, while LanL2DZ pseudopotential was used for Cu and I. The unrestricted DFT calculations were employed to optimize the T<sub>1</sub> structure with the same function and basis set.

**Time-Dependent Density Functional Theory (TDDFT) Calculations.** TDDFT calculations were used to investigate the photophysical properties of the compounds. The calculations were performed with the same function and basis set as described for the DFT optimizations. The first 15 singlet states without geometry optimization were calculated for the absorption transition based on the S<sub>0</sub> structure. The first 5 singlet states with geometry optimization were calculated for the fluorescence transition based on the S<sub>0</sub> structure. The first 5 triplet states without geometry optimization were calculated for the phosphorescence transition of T<sub>1</sub>→S<sub>0</sub> based on the T<sub>1</sub> structure, which was based on the unrestricted DFT calculation. The Milliken orbital composition analyses were calculated by the Multiwfn

program.<sup>4</sup> The VMD (Visual Molecular Dynamics) software is used for reading, visualizing, and creating data images obtained from Gaussian calculations.<sup>5</sup> The atomic coordination are shown in Table S5-6.

#### **Calculations of Binding Energies between CO<sub>2</sub>/CH<sub>3</sub>CN and Adjacent Phenyl Rings.**

Periodic DFT was calculated by Dmol3 module of Materials Studio 8.0 software package. Geometry optimizations were used to get the precise structure, original from crystal structure. And the non-hydrogen atoms of the host framework were fixed during the geometry optimizations. The Perdew-Burke-Ernzerhof (PBE) generalized gradient approximation (GGA) exchange–correlation functional with the double numeric plus (DNP) polarization basis set was utilized.<sup>6</sup> The effective core potentials were used. Grimme semiempirical methods to describe the long-range van der Waals interactions. The DFT-D are employed to the dispersion correction.<sup>7</sup> The convergence tolerance was as follows: 10<sup>-5</sup> Ha (Energy), 0.002 Ha/Å (Max. force) and 0.005 Å (Max. displacement).

Then the corresponding structural segments (one hydrogen atom was added to change phenyl group into benzene for convenience) were performed by Gaussian 09 program, based on the above period structure. Binding energies were performed using by PBE0 density function with D3 dispersion correction.<sup>3</sup> The 6-31G(d) basis set was used for C, O and H. The binding energy ( $\Delta E$ ) was computed by the following equation:  $\Delta E = E(\text{benzene and guest}) - E(\text{benzene}) - E(\text{guest})$ . The calculation results are shown in Table S4. The atomic coordination are shown in Table S7-8.

## 2. Figures and Tables

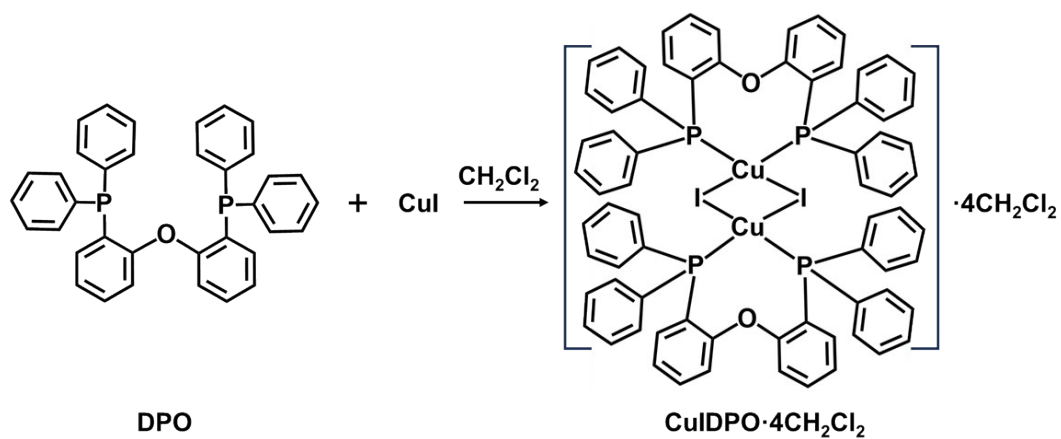

**Fig. S1.** Schematic diagram of the synthesis of  $\text{CuIDPO} \cdot \text{CH}_2\text{Cl}_2$ .

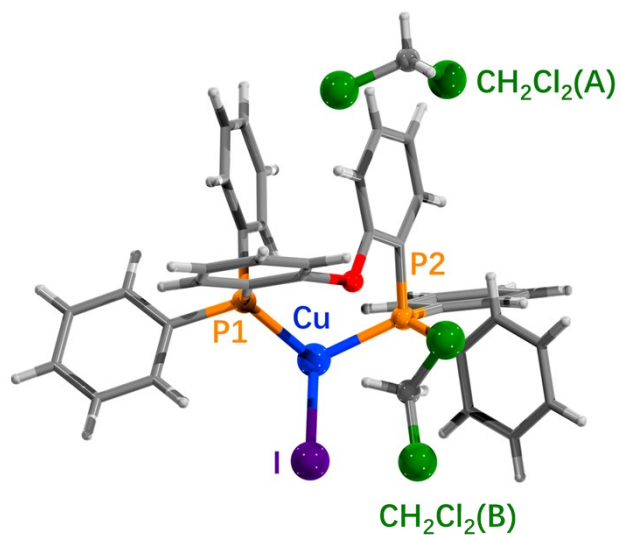

**Fig. S2.** An asymmetric unit of  $\text{CuIDPO} \cdot \text{CH}_2\text{Cl}_2$  (SCXRD data at 150 K). Color codes: Cu, blue; I, purple; P, orange; C, grey; O, red; H white; Cl, green.

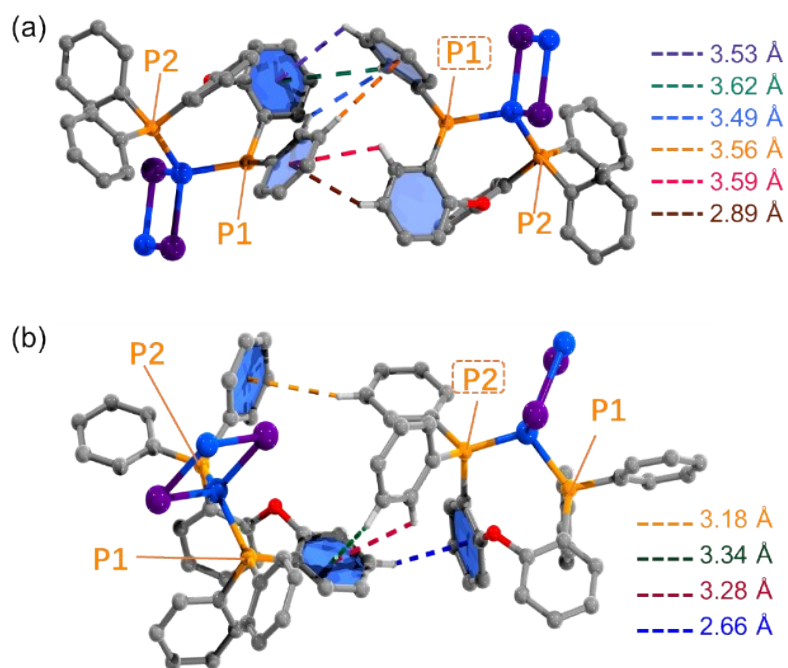

**Fig. S3.** The C–H··· $\pi$  interactions of phenyl rings linked to (a) P1 and (b) P2 of an adjacent CuIDPO (SCXRD data at 291.6K) cluster. Color codes: Cu, blue; I, purple; P, orange; C, grey; H white; O, red. Hydrogen atoms without interaction sites are omitted for clarity.

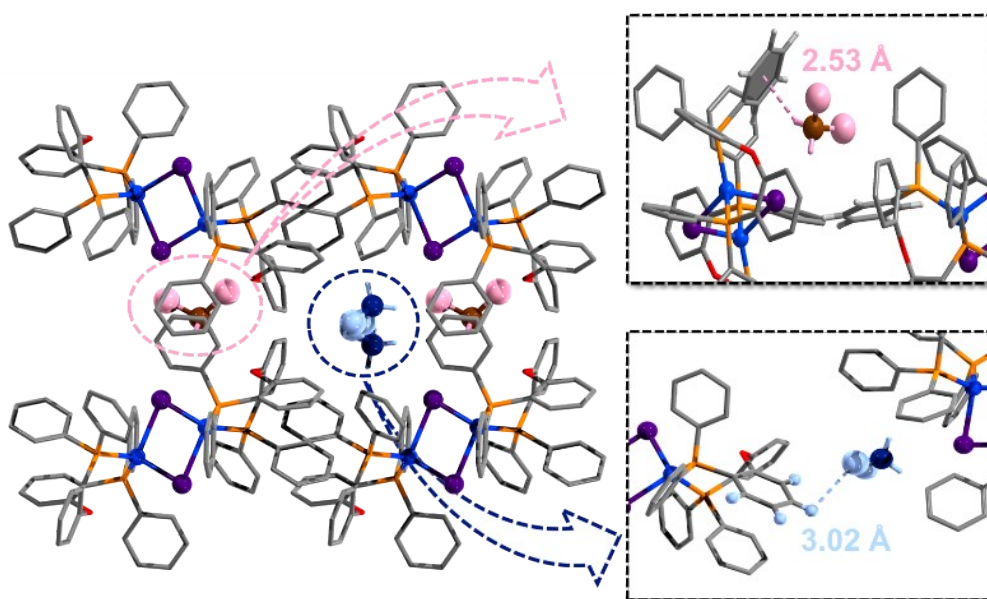

**Figure S4.** Molecular stacking model in CuIDPO·CH<sub>2</sub>Cl<sub>2</sub> (SCXRD data at 150 K) viewed along the *c*-axis. The distance of C–H··· $\pi$  between CH<sub>2</sub>Cl<sub>2</sub>(A) (pink) and its adjacent phenyl ring is 2.53 Å, while C–H···Cl between the CH<sub>2</sub>Cl<sub>2</sub>(B) (blue) and its adjacent phenyl ring is 3.02 Å. Color codes: Cu, blue; I, purple; P, orange; C, grey; O, red. Hydrogen atoms without interaction sites are omitted for clarity.

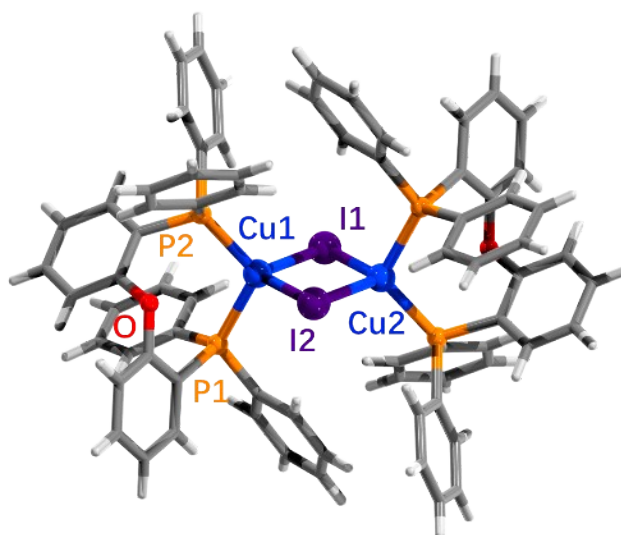

**Fig. S5.** Molecular structure of CuIDPO (SCXRD data at 291.6 K). Color codes: Cu, blue; I, purple; P, orange; C, grey; H white; O, red.

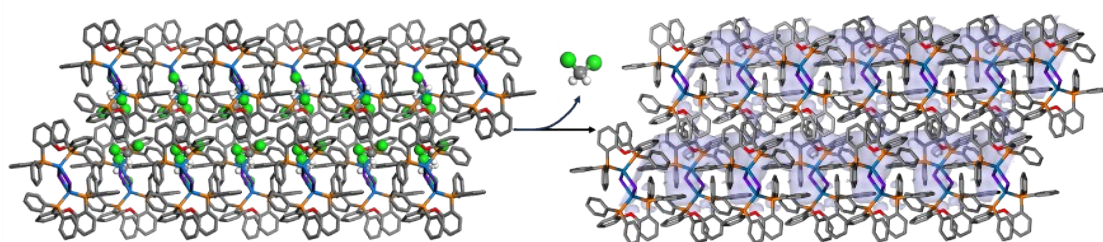

**Fig. S6.** Comparison of the framework and pore surface structure of CuIDPO·CH<sub>2</sub>Cl<sub>2</sub> (SCXRD data at 150 K) (left) and guest-free CuIDPO (SCXRD data at 150 K) (right) after removing guest CH<sub>2</sub>Cl<sub>2</sub>. Except the guest molecules, hydrogen atoms are omitted for clarity.

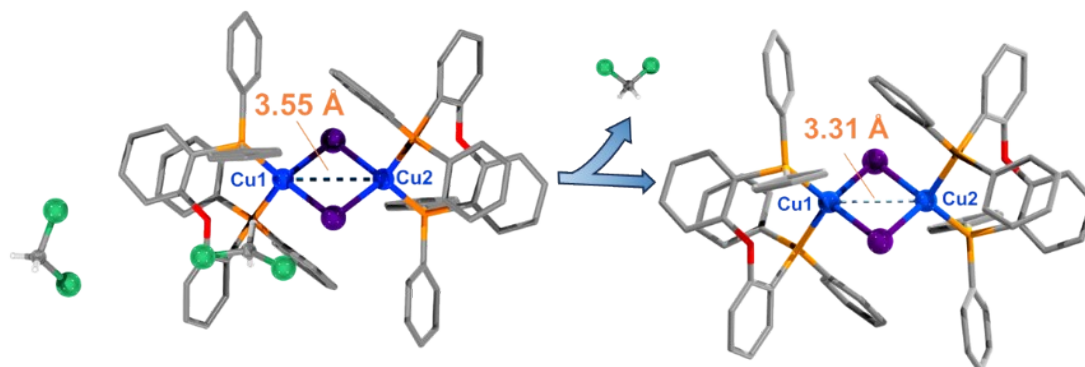

**Fig. S7.** Comparison of the intramolecular Cu–Cu distance in CuIDPO·CH<sub>2</sub>Cl<sub>2</sub> (SCXRD data at 150 K) (left) and guest-free CuIDPO (SCXRD data at 150 K) (right). Color codes: Cu, blue; I, purple; P, orange; C, grey; H white; O, red; Cl, green. Except the guest molecules, hydrogen atoms are omitted for clarity.



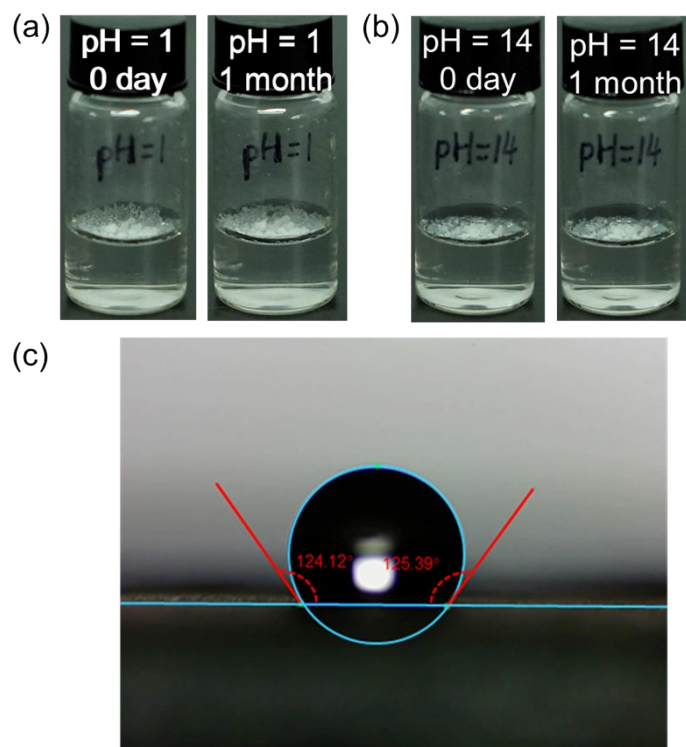

**Fig. S8.** Photographs of CuIDPO before and after immersion in the aqueous solutions of (a) pH = 1 and (b) pH = 14 for 1 month. (c) Photograph of CuIDPO in the contacting angle test. The average of contact angles is 124.75°.

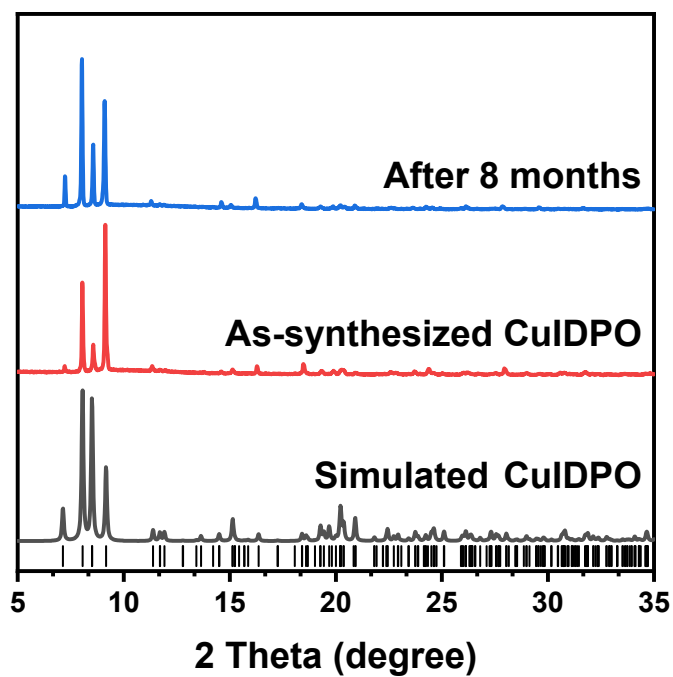

**Fig. S9.** PXRD patterns of as-synthesized CuIDPO and that after exposure in air for 8 months.

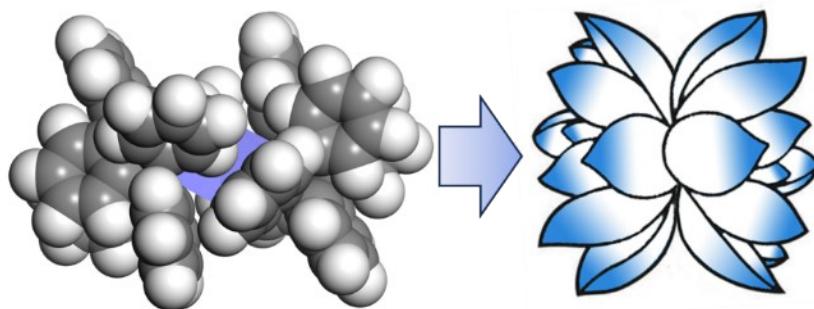

**Fig. S10.** The petal-like structure of CuIDPO (SCXRD data at 291.6 K). Color codes: Cu, blue; I, purple; P, orange; C, grey; H white; O, red.

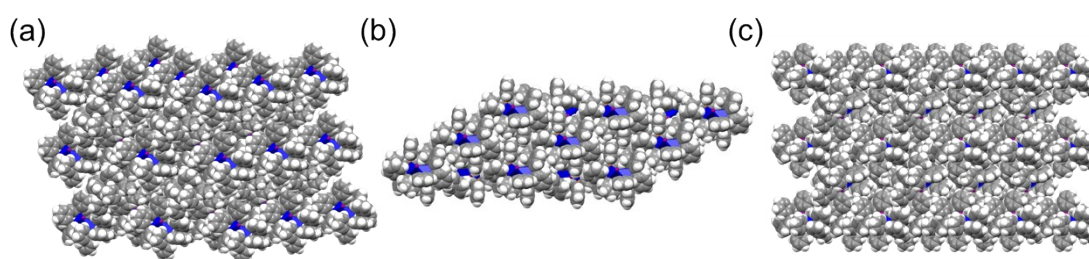

**Fig. S11.** (a-c) The (100), (010) and (001) crystal planes of CuIDPO (SCXRD data at 291.6 K). Color codes: Cu, blue; I, purple; P, orange; C, grey; H white; O, red.

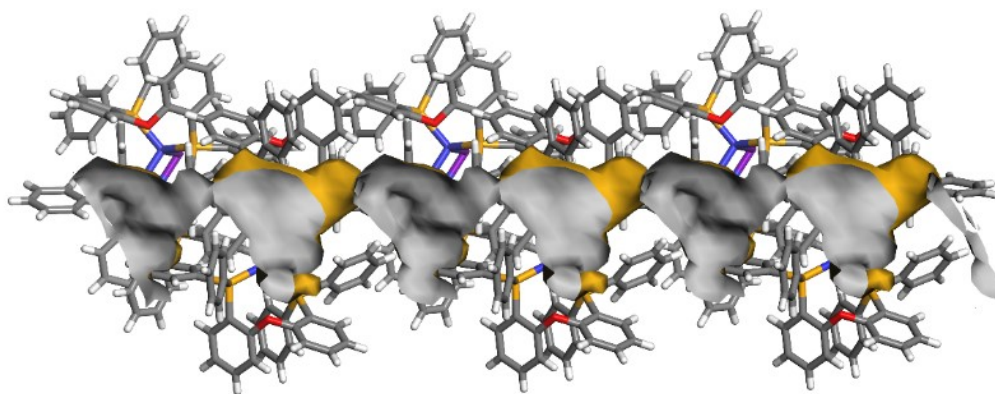

**Fig. S12.** Structure of the hydrophobic pore surface of guest-free CuIDPO (SCXRD data at 291.6 K). Color codes: Cu, blue; I, purple; P, orange; C, grey; H white; O, red.

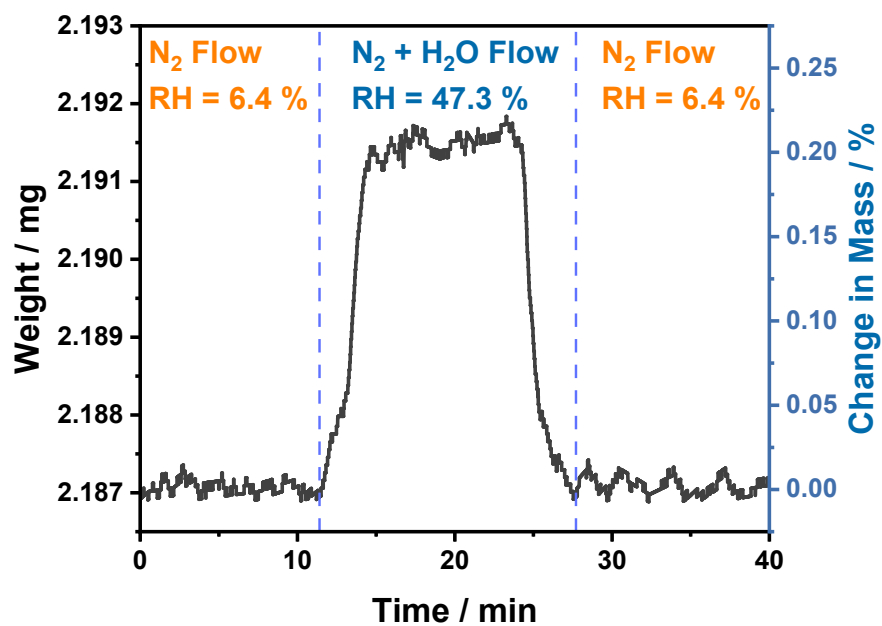

**Fig. S13.** Dynamic adsorption-desorption TGA curve of CuIDPO.

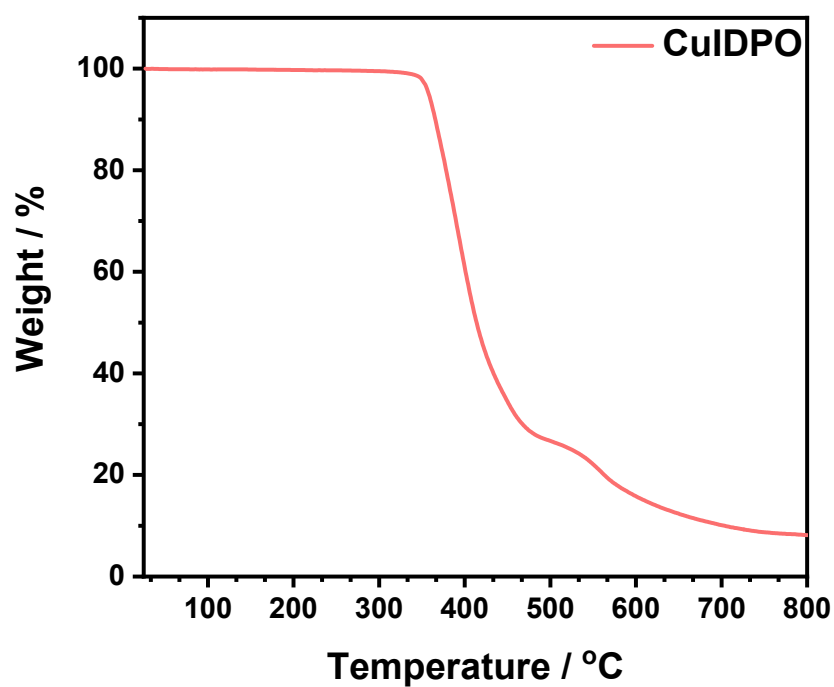

**Fig. S14.** Thermogravimetric (TG) curve of CuIDPO.

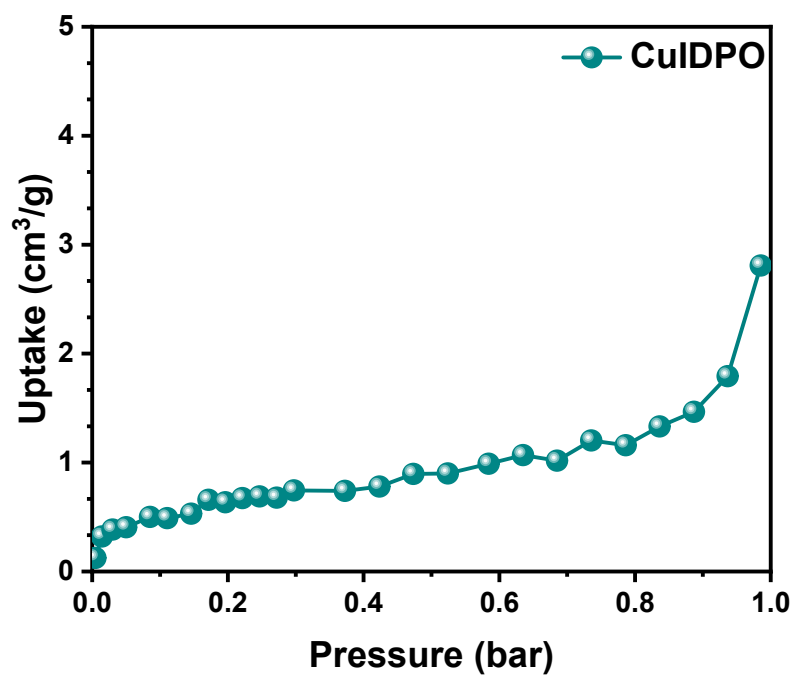

**Fig. S15.** N<sub>2</sub> sorption isotherm for CuIDPO at 77 K.

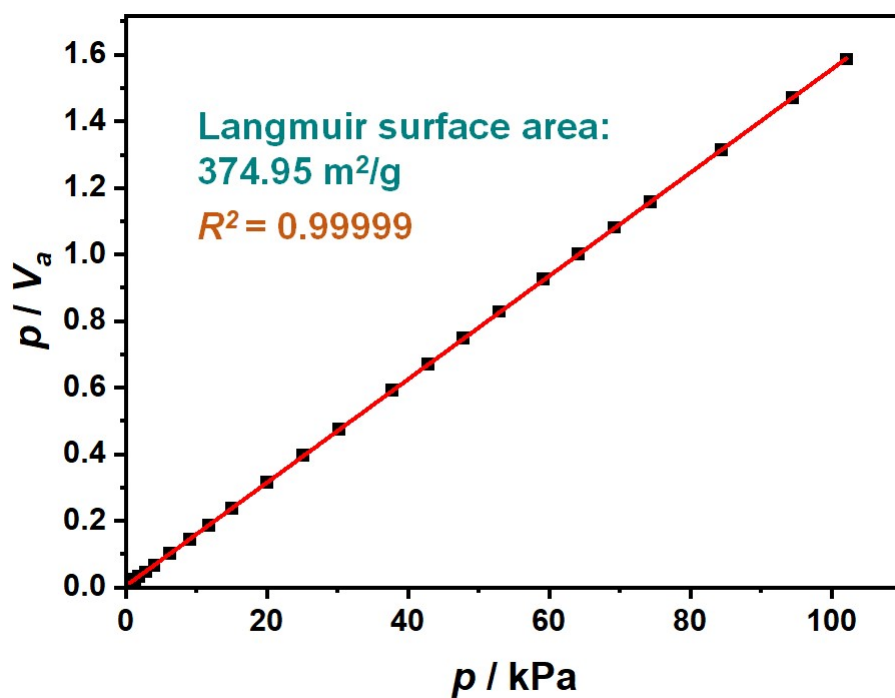

**Fig. S16.** The fitting curve of Langmuir surface area based on CO<sub>2</sub> sorption isotherm at 195 K.

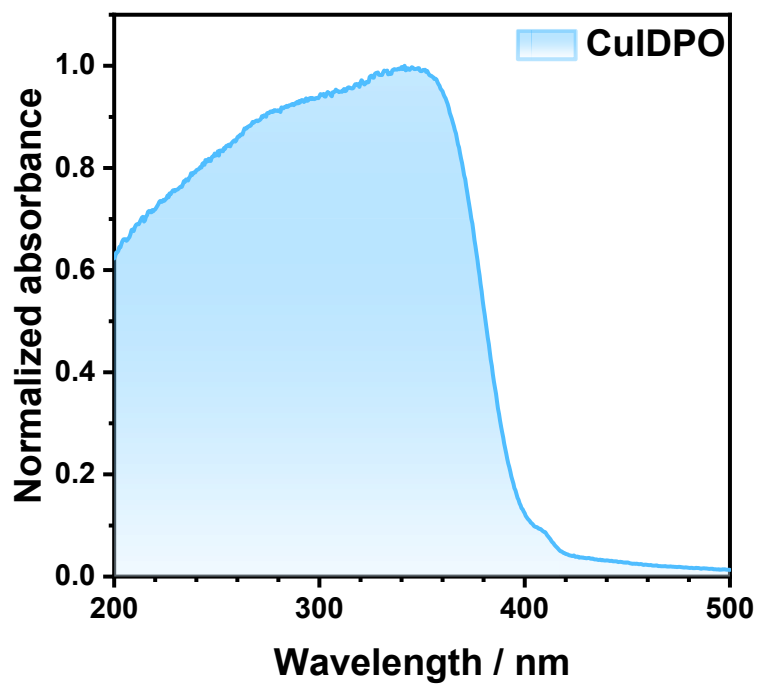

**Fig. S17.** UV-vis adsorption spectra of CuIDPO at room temperature.

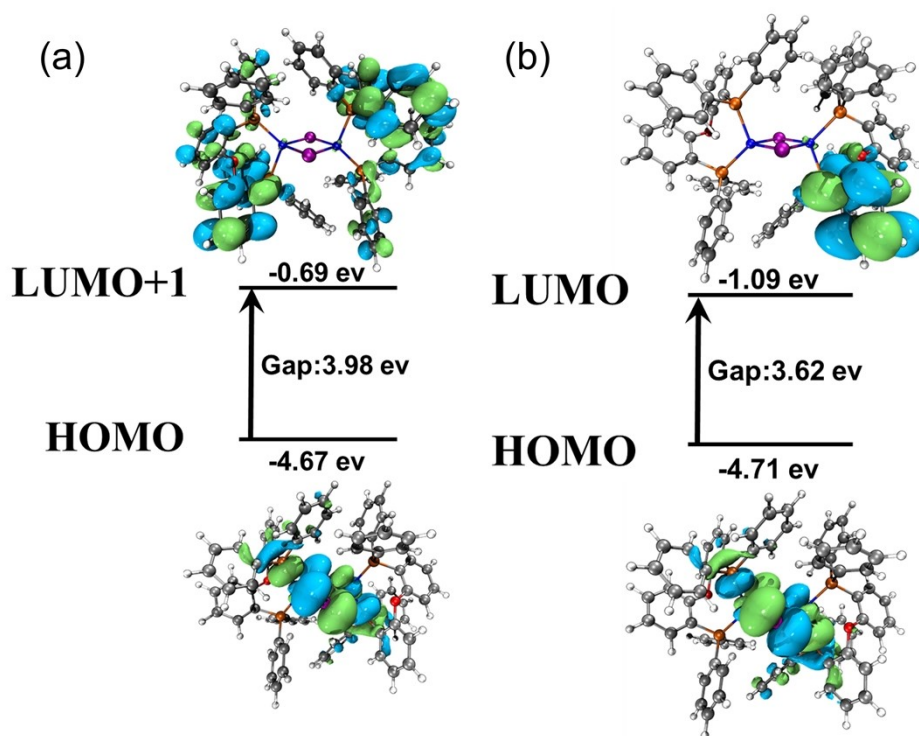

**Fig. S18.** (a) The  $S_0 \rightarrow S_2$  and (b)  $S_0 \rightarrow T_1$  transitions of CuIDPO, evaluated by DFT and TDDFT calculations.

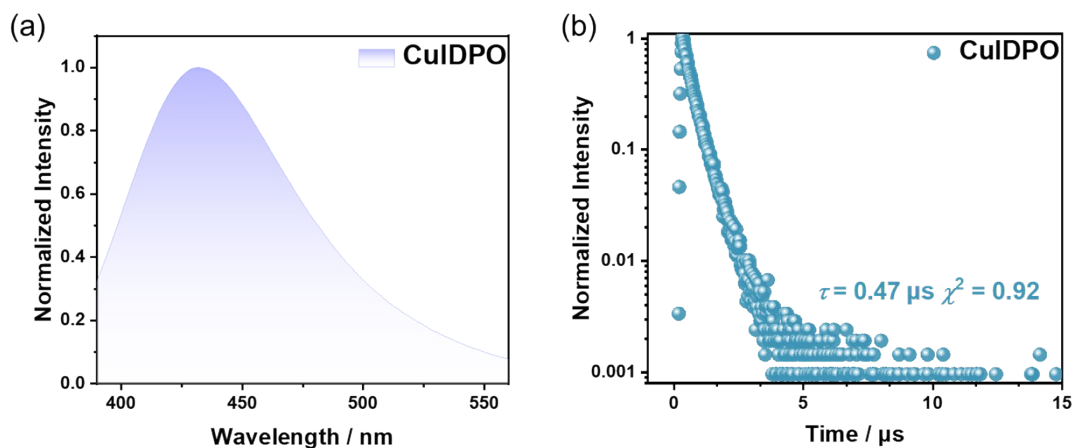

**Fig. S19.** (a) Emission spectra of CuIDPO in air, excited at 365 nm. (b) Luminescence decay curves of CuIDPO in air, excited by 375 nm VPL and detected at 432 nm.

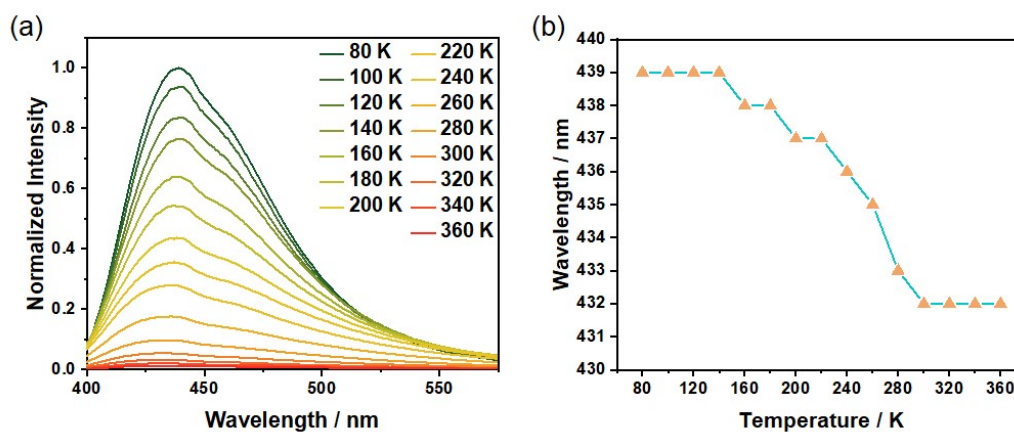

**Fig. S20.** (a) Emission spectra of CuIDPO at different temperatures between 80 K and 360 K, excited at 365 nm. (b) The plot of emission peak maximum ( $\lambda_{em}$ ) against temperature based on (a).

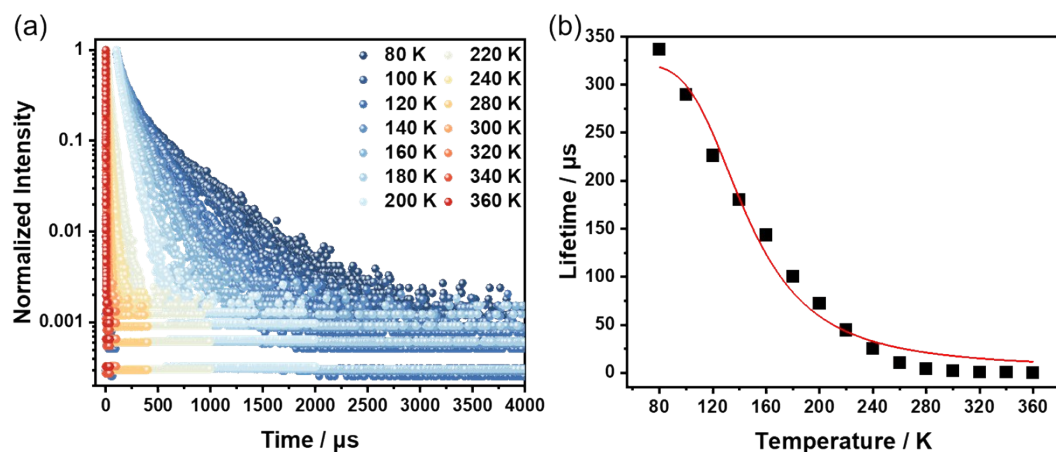

**Fig. S21.** (a) Luminescence decay curves of CuIDPO between 80 K and 360 K, excited by 375-nm VPL and detected at 432 nm. (b) Plot of emission decay time against temperature; red line represents the fit according to eq (S1).

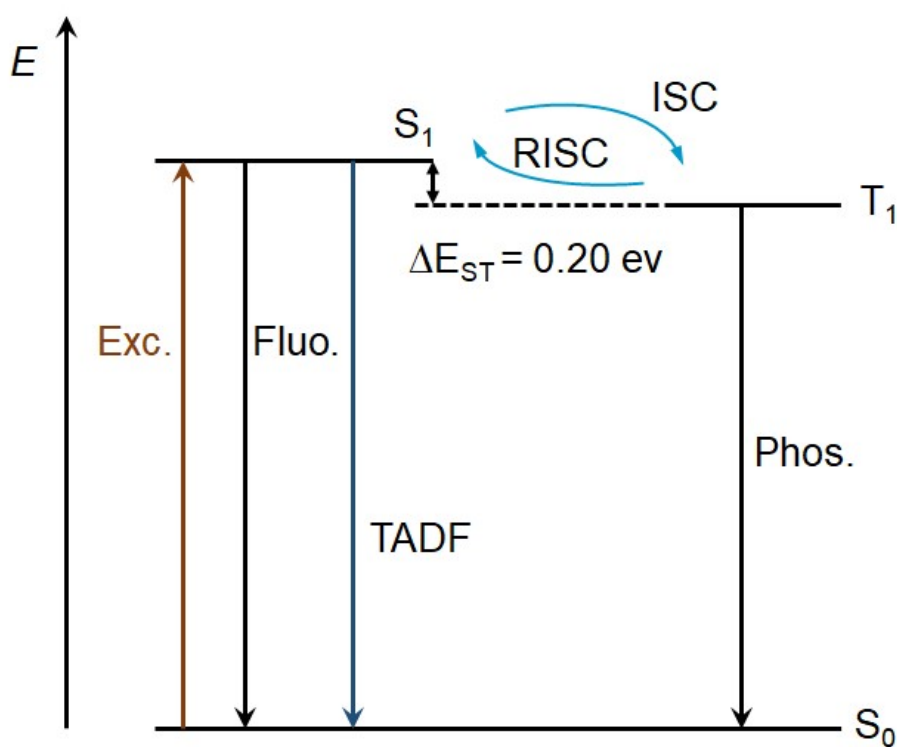

**Fig. S22.** Simplified Jablonski diagram of CuIDPO TADF emitter based on the DFT and TDDFT calculations.  $S_1$ ,  $T_1$ ,  $S_0$ , ISC and RISC represent the first singlet excited state, the first triplet excited state, ground state, intersystem conversion, reverse intersystem conversion, respectively.

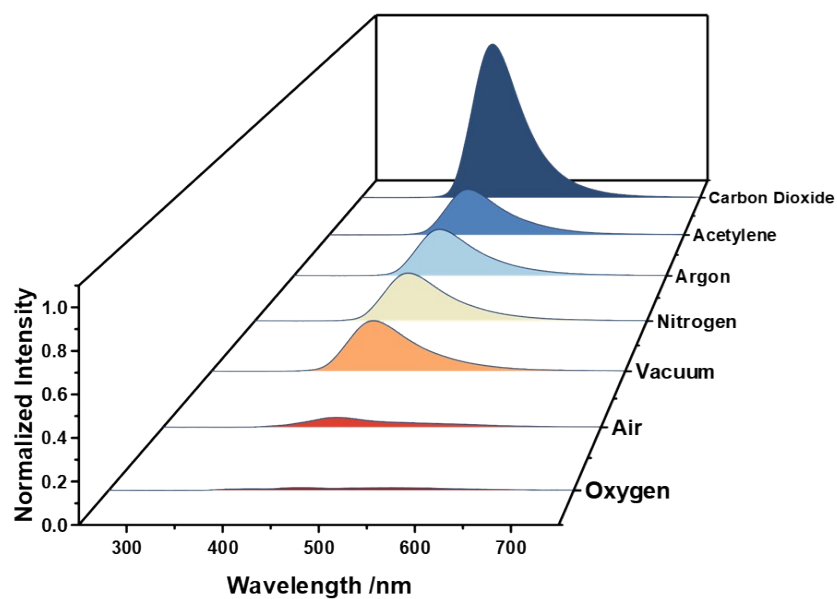

**Fig. S23.** Emission spectra of CuIDPO in different gases, excited by 365 nm LED.

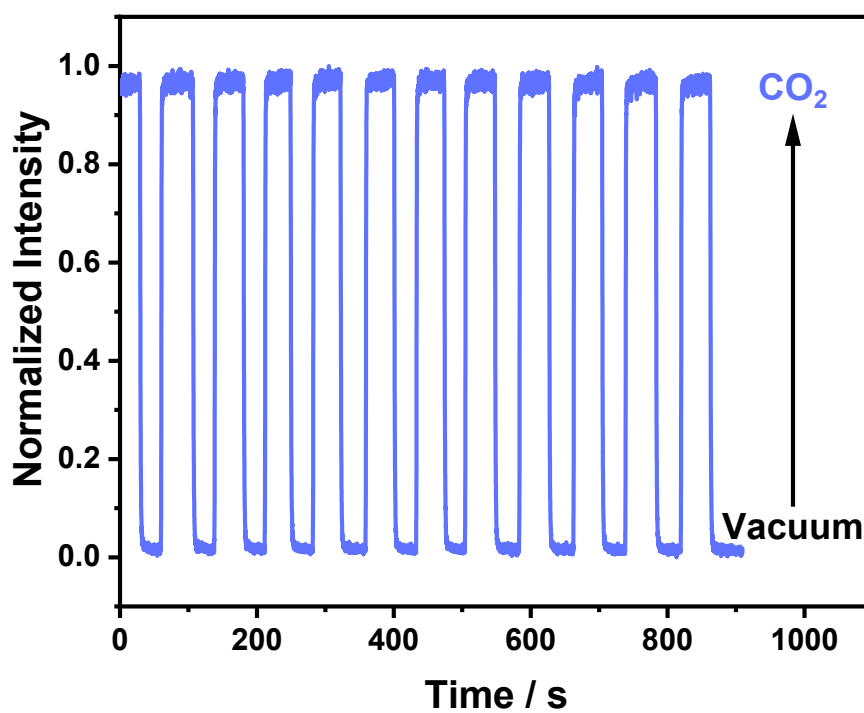

**Fig. S24.** Kinetic scan of CuIDPO when alternating vacuum and CO<sub>2</sub>, excited at 365 nm and detected at 432 nm.



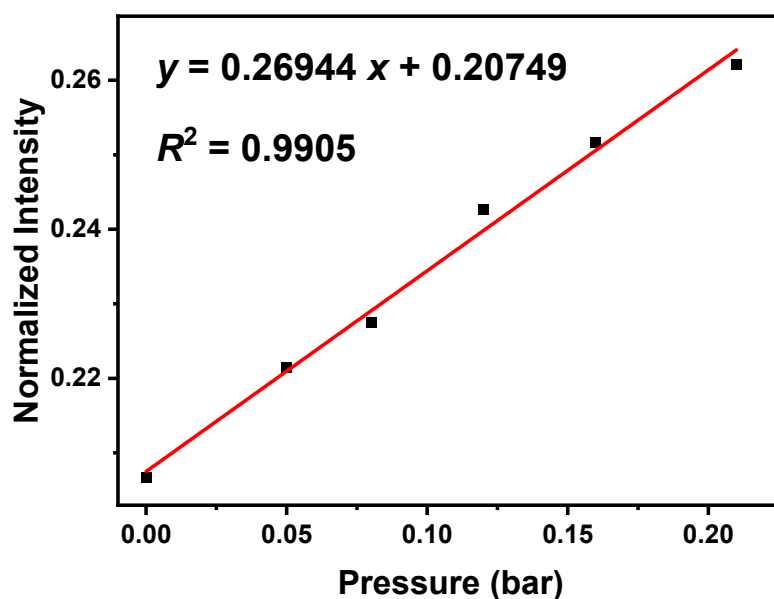

**Fig. S25.** The luminescence intensity of CuIDPO in 0.034 mbar to 210 mbar CO<sub>2</sub>. The curve was fitted according to the linear function ( $y = k \times x + b$ ). The LOD were defined at 1% enhancing to ensure comparability, which makes them not subject to specific instrumental characteristics or artificial operation error. We define the point that CO<sub>2</sub> begins to enhance the luminescence as ( $x_0, y_0$ ) in the linear function. We think that the intensity of the  $x$  value of LOD ( $x_{LOD}$ ) will increase to  $1.01y_0$ , meaning the luminescence has been enhanced 1%. Therefore,  $1.01y_0 = k \times x_{LOD} + b$ ,  $y_0 = k \times x_0 + b$ ,  $x_{LOD} = x_0 + y_0 / 100k$  eq(S2).

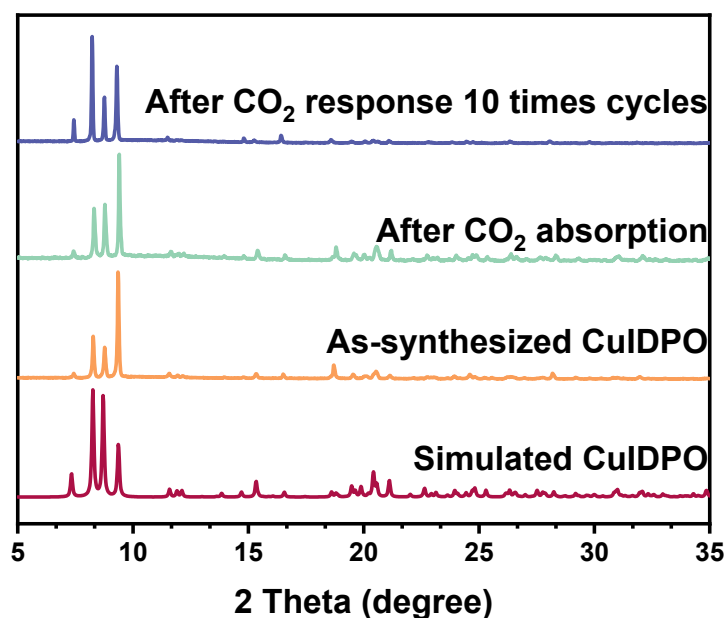

**Fig. S26.** PXRD patterns of as-synthesized CuIDPO and those after the CO<sub>2</sub> adsorption experiments and CO<sub>2</sub> sensing experiments.

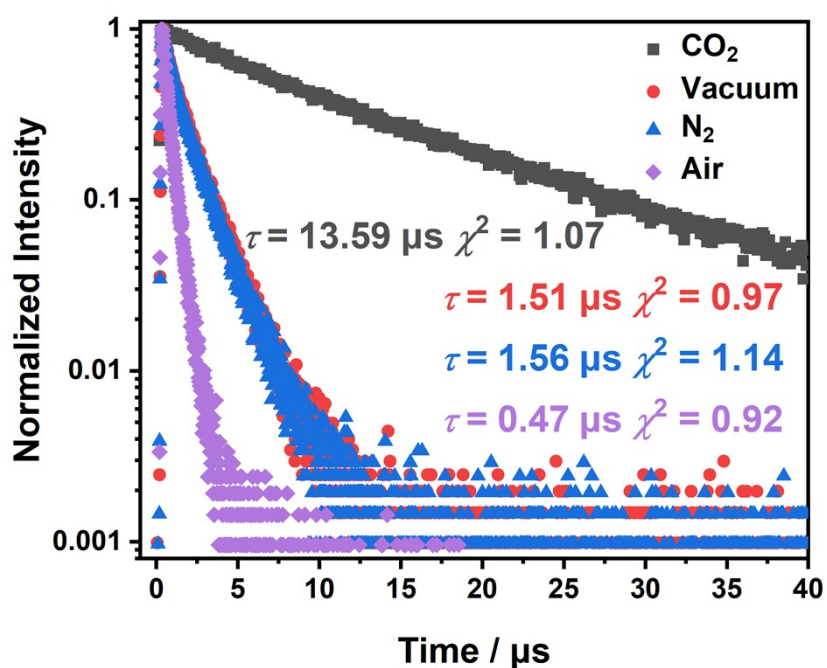

**Fig. S27.** The decay curves of CuIDPO in different gas atmospheres at room temperature, excited by 375-nm VPL and detected at 432 nm.

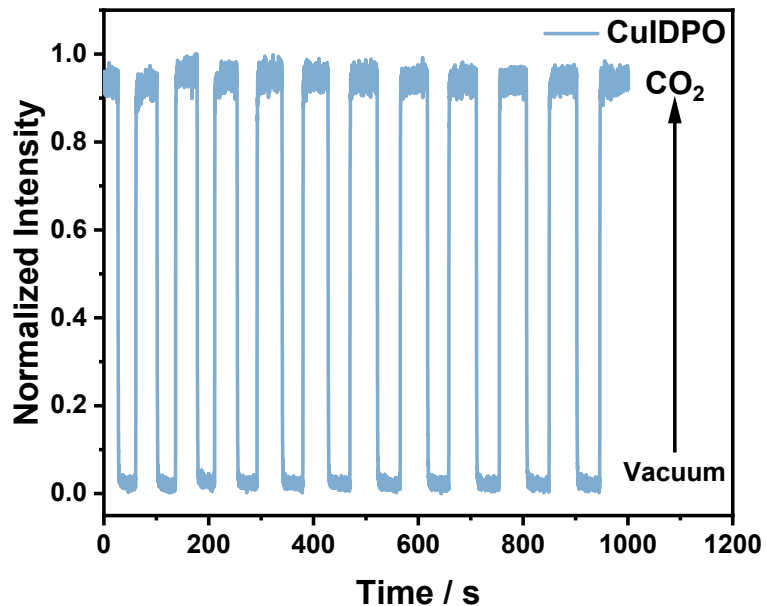

**Fig. S28.** Kinetic scan of CuIDPO after immersion in the aqueous solutions at pH = 1 for 1 week when alternating vacuum and  $\text{CO}_2$ , excited at 365 nm and detected at 432 nm.

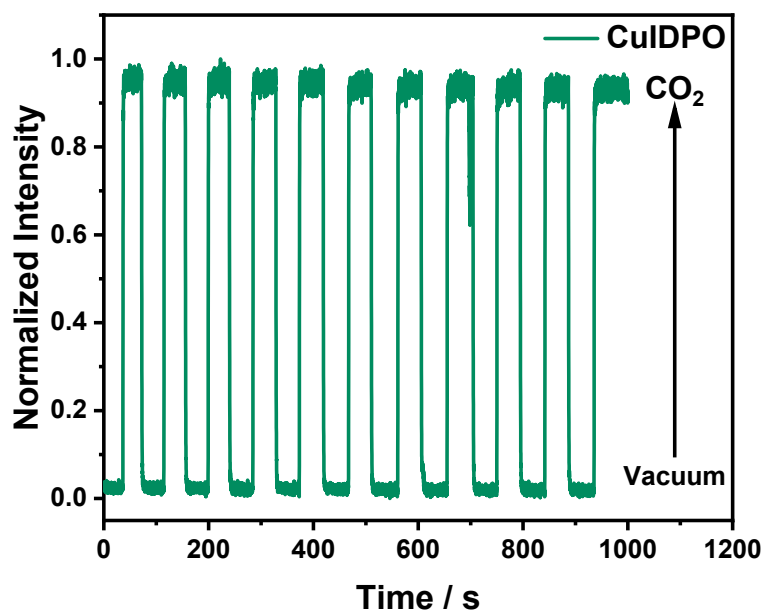

**Fig. 29.** Kinetic scan of CuIDPO after immersion in the aqueous solutions of pH = 14 for 1 week when alternating vacuum and CO<sub>2</sub>, excited at 365 nm and detected at 432 nm.

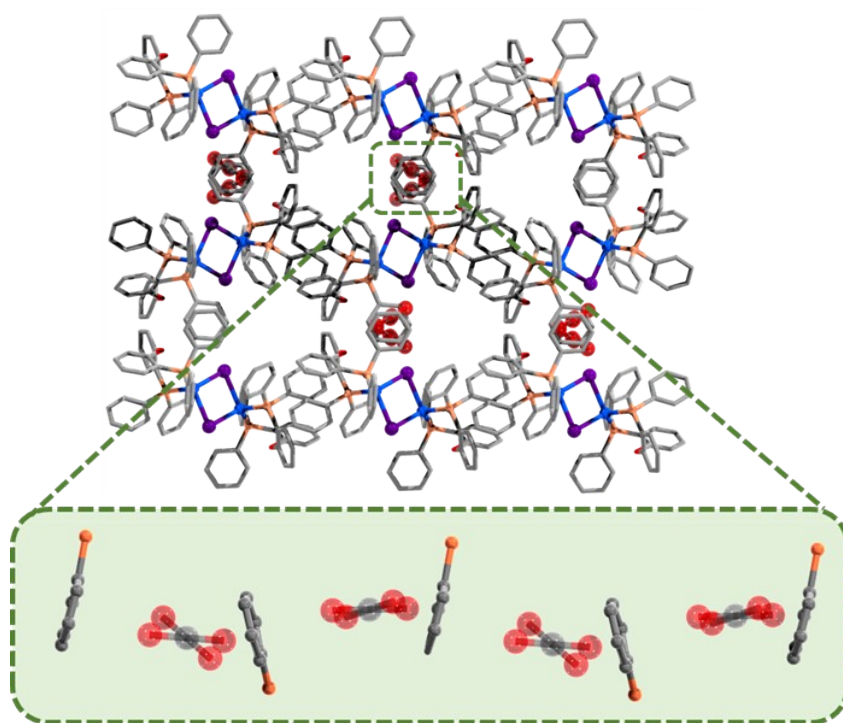

**Fig. S30.** Crystal structure of CuIDPO·CO<sub>2</sub> at 291 K. Color codes: Cu, blue; I, purple; P, orange; C, grey; O, red. All hydrogen atoms are omitted for clarity.

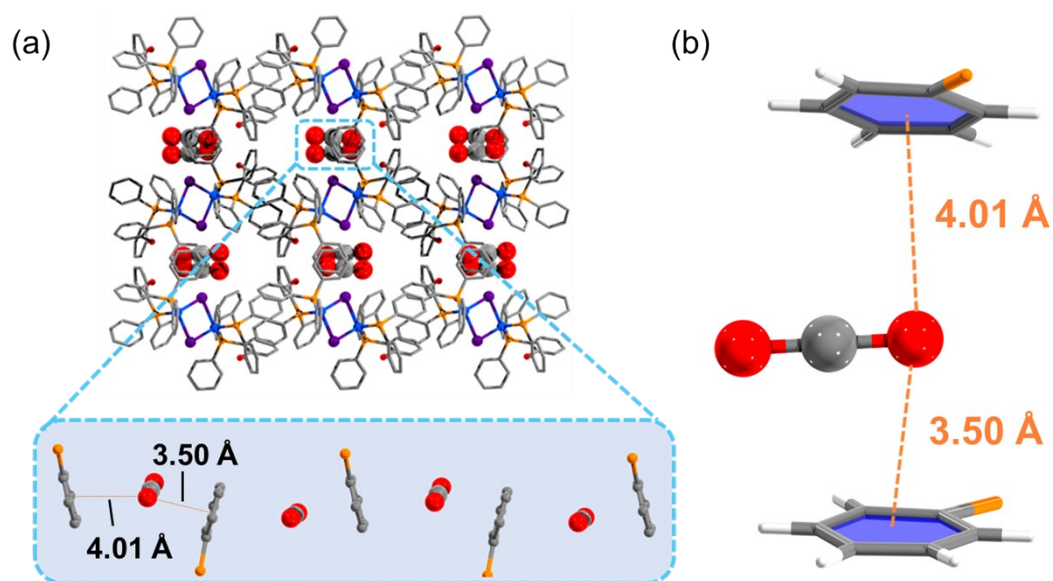

**Fig. S31.** (a) Crystal structure of CuIDPO·CO<sub>2</sub> at 150 K. (b) The π-π interaction between CO<sub>2</sub> and phenyl ring in CuIDPO·CO<sub>2</sub>. Color codes: Cu, blue; I, purple; P, orange; C, grey; H white; O, red. Some hydrogen atoms are omitted for clarity.

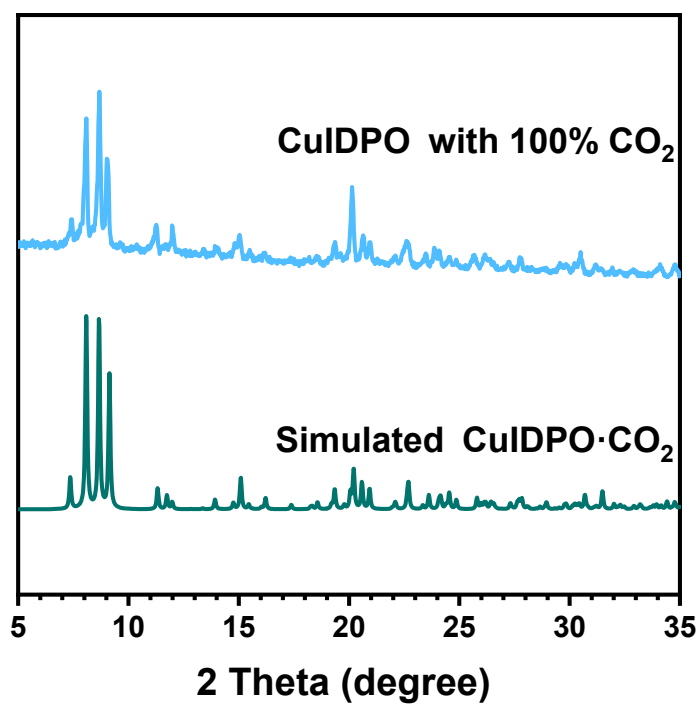

**Fig. S32.** PXRD patterns of CuIDPO in 100% CO<sub>2</sub> at room temperature.

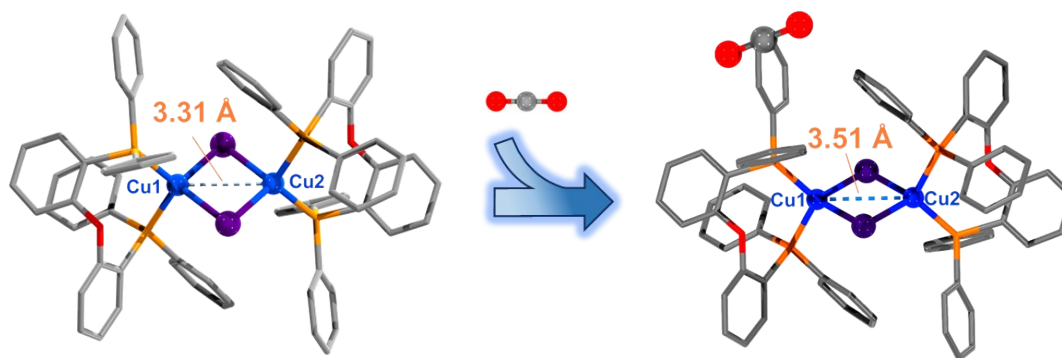

**Fig. S33.** The Cu...Cu distances of guest-free CuIDPO (SCXRD data at 150 K) and CuIDPO·CO<sub>2</sub> (SCXRD data at 150 K). Color codes: Cu, blue; I, purple; P, orange; C, grey; O, red. All hydrogen atoms are omitted for clarity.

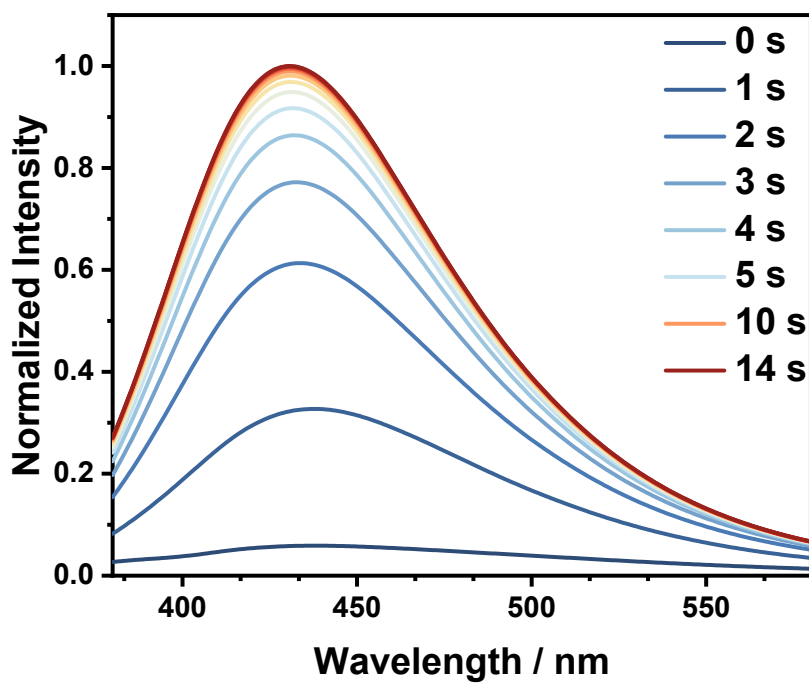

**Fig. S34.** Time-dependent emission spectra of CuIDPO after exposure in CH<sub>3</sub>CN saturated vapor, excited by a 365 nm LED.

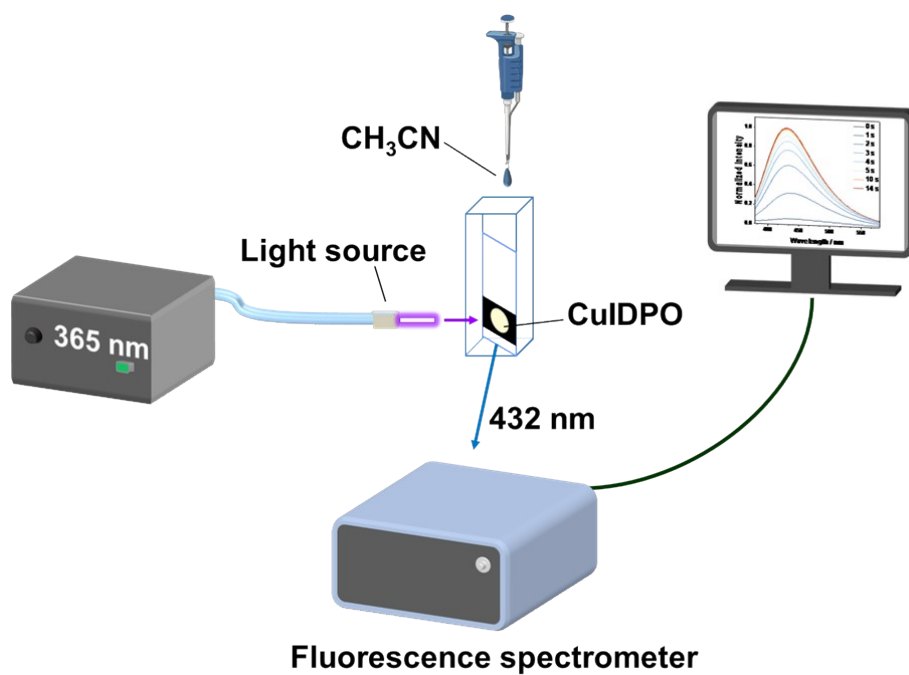

**Fig. S35.** Schematic diagram of the in-situ solid state luminescence sensing for  $\text{CH}_3\text{CN}$ .

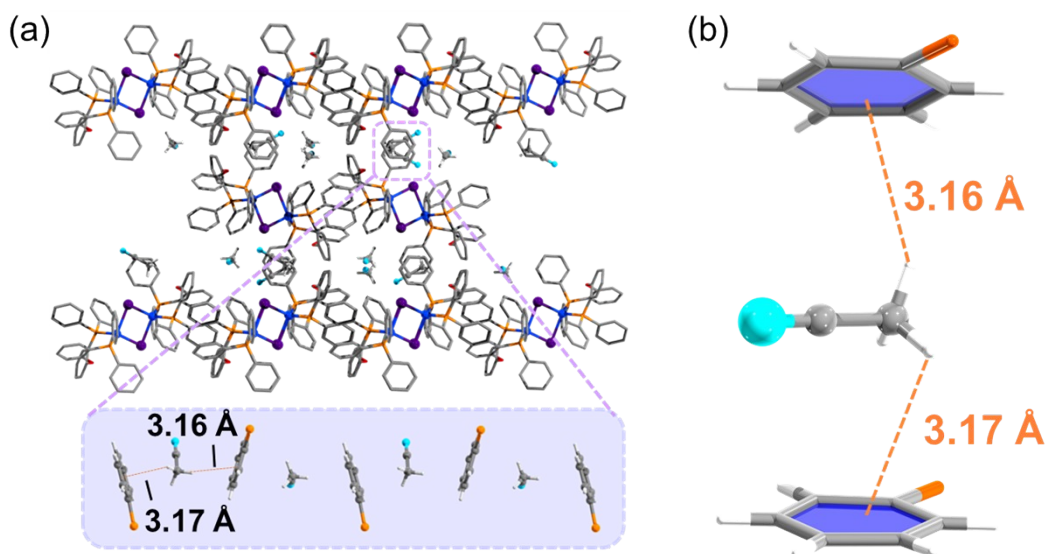

**Fig. S36.** (a) The crystal structure of  $\text{CuIDPO} \cdot \text{CH}_3\text{CN}$  at 150 K. (b) The C-H... $\pi$  interaction between  $\text{CH}_3\text{CN}$  and phenyl ring of  $\text{CuIDPO} \cdot \text{CH}_3\text{CN}$ . Color codes: Cu, blue; I, purple; P, Orange; C, grey; N, turquoise; H white; O, red. Some hydrogen atoms are omitted for clarity.

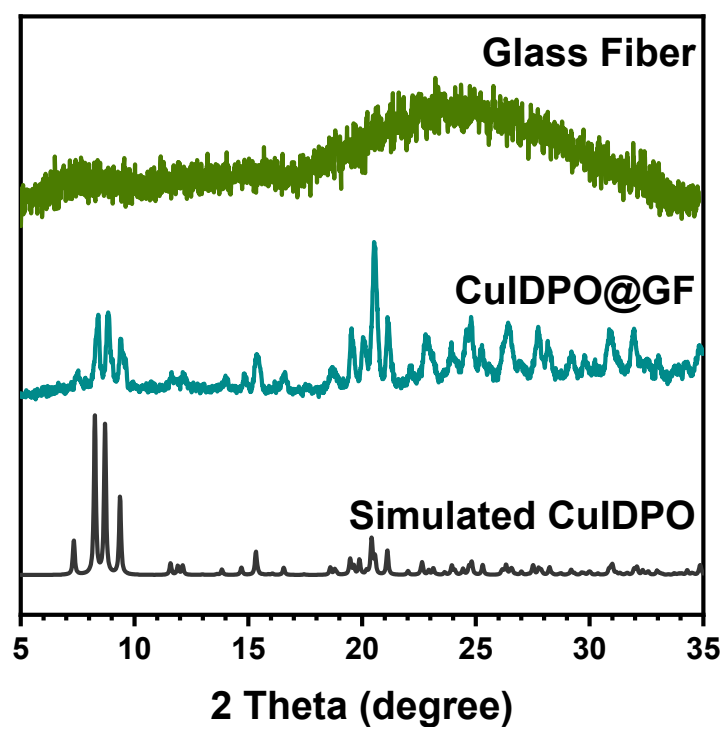

**Fig. S37.** PXRD patterns of CuIDPO@GF and the GF paper.

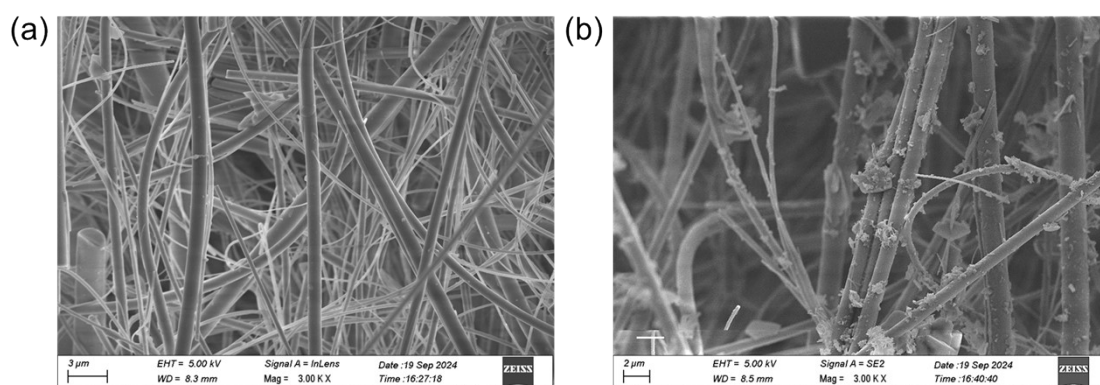

**Fig. S38.** SEM images of (a) GF paper and (b) CuIDPO@GF.

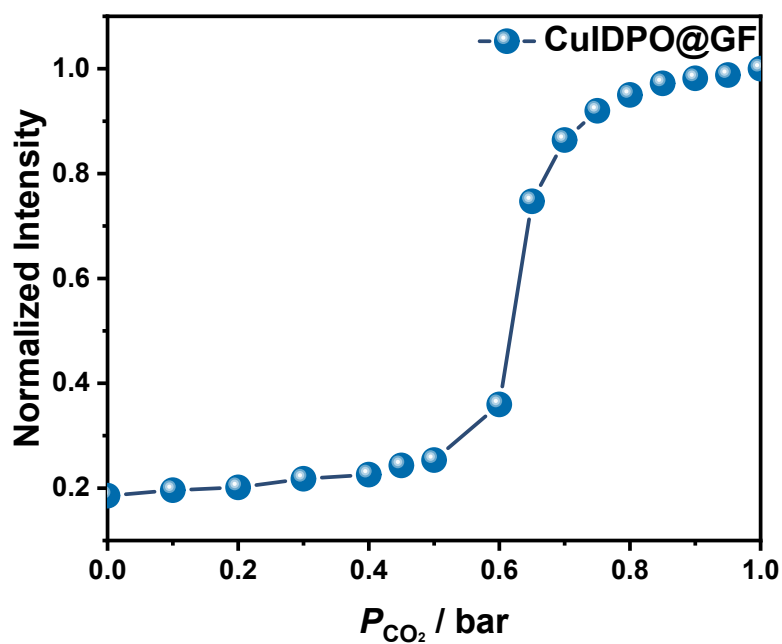

**Fig. S39.** The intensity enhancement curve for CuIDPO@GF in different pressures of  $\text{CO}_2$ , excited at 365 nm and detected at 432 nm.

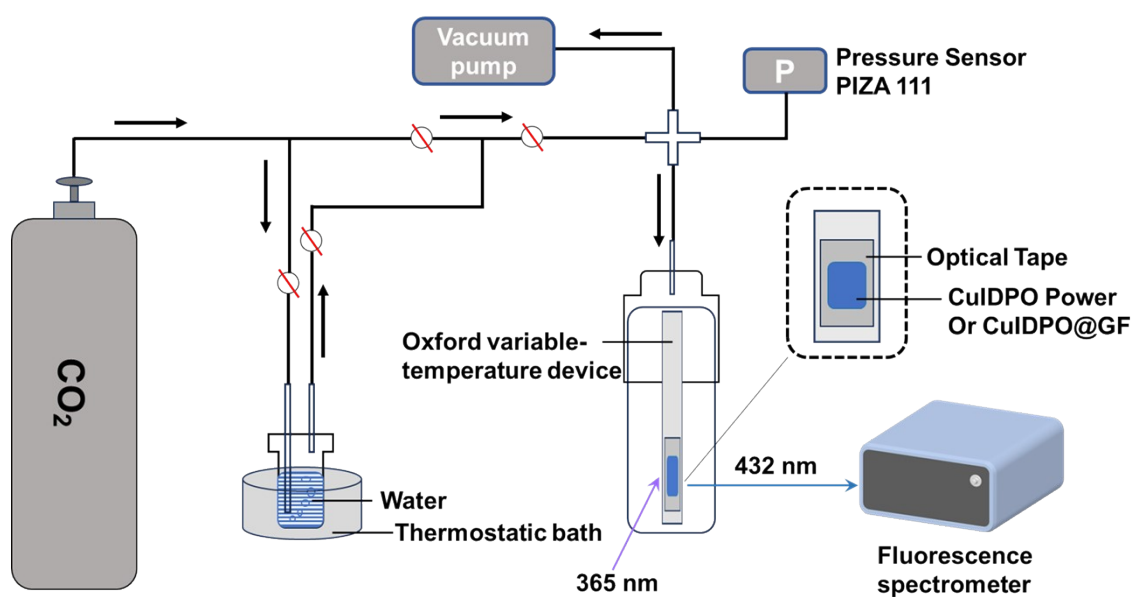

**Fig. S40.** Schematic diagram of the device for testing high humidity  $\text{CO}_2$  fluorescence response.



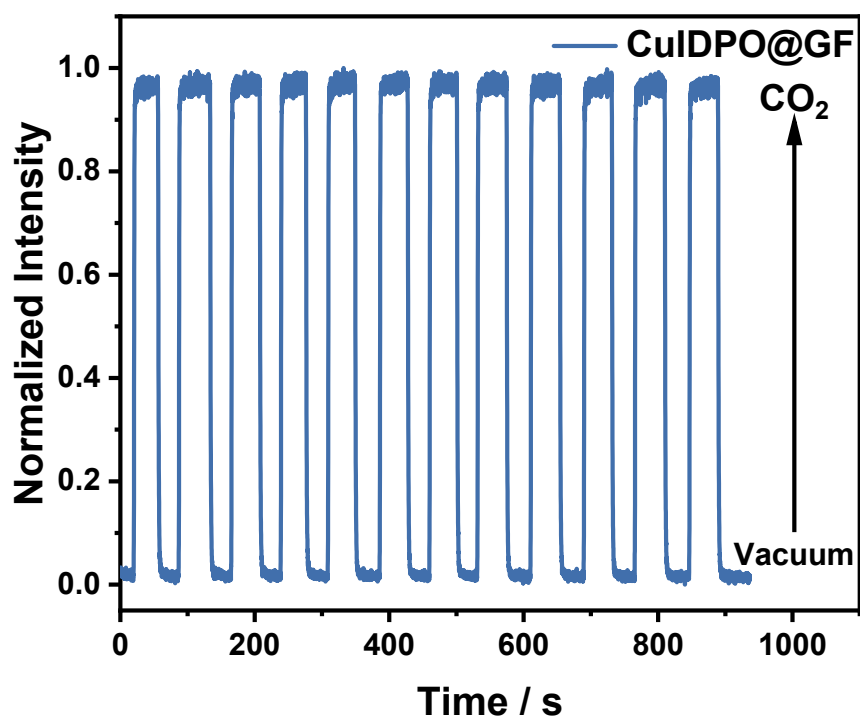

**Fig. S41.** Kinetic scan of CuIDPO@GF when alternating vacuum and humid CO<sub>2</sub>, excited at 365 nm and detected at 432 nm.

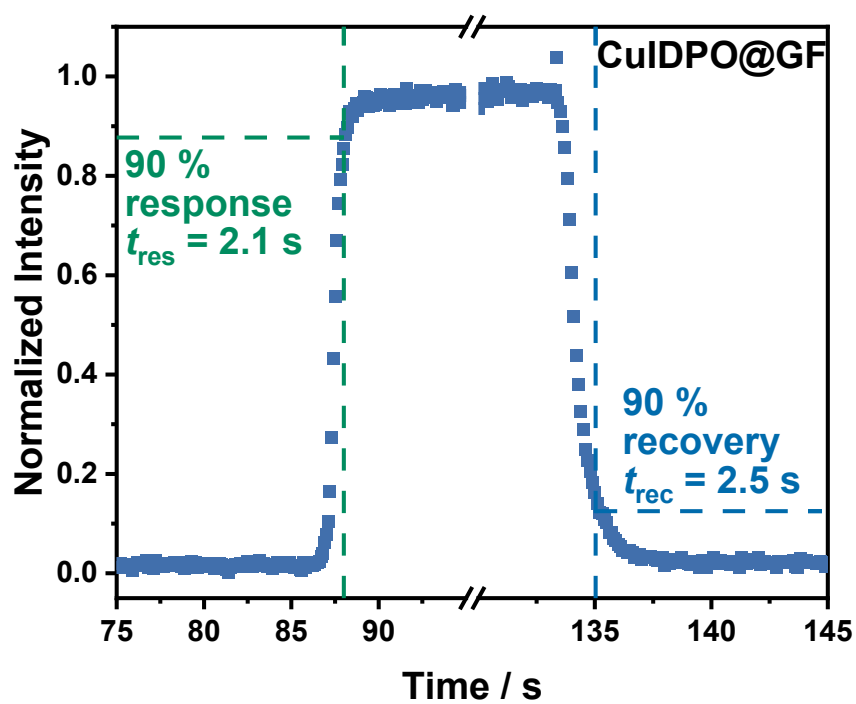

**Fig. S42.** Enlargement of one cycle of Fig. S41.

**Table S1.** Crystallographic data and structural refinement parameters.

| Compounds                                                        | CuIDPO·CH <sub>2</sub> Cl <sub>2</sub>                                                                       | CuIDPO                                                                                       | CuIDPO                                                                                       |
|------------------------------------------------------------------|--------------------------------------------------------------------------------------------------------------|----------------------------------------------------------------------------------------------|----------------------------------------------------------------------------------------------|
| Formula                                                          | C <sub>76</sub> H <sub>64</sub> Cl <sub>8</sub> Cu <sub>2</sub> I <sub>2</sub> O <sub>2</sub> P <sub>4</sub> | C <sub>72</sub> H <sub>56</sub> Cu <sub>2</sub> I <sub>2</sub> O <sub>2</sub> P <sub>4</sub> | C <sub>72</sub> H <sub>56</sub> Cu <sub>2</sub> I <sub>2</sub> O <sub>2</sub> P <sub>4</sub> |
| Formula weight                                                   | 1798                                                                                                         | 1458                                                                                         | 1458                                                                                         |
| <i>T</i> / K                                                     | 150.00(10)                                                                                                   | 291.6(3)                                                                                     | 149.99(10)                                                                                   |
| Crystal system                                                   | monoclinic                                                                                                   | monoclinic                                                                                   | monoclinic                                                                                   |
| Space group                                                      | <i>P</i> 2 <sub>1</sub> / <i>c</i>                                                                           | <i>P</i> 2 <sub>1</sub> / <i>c</i>                                                           | <i>P</i> 2 <sub>1</sub> / <i>c</i>                                                           |
| <i>a</i> / Å                                                     | 13.5563(2)                                                                                                   | 13.5886(1)                                                                                   | 13.4634(8)                                                                                   |
| <i>b</i> / Å                                                     | 20.7370(2)                                                                                                   | 18.8697(2)                                                                                   | 18.7343(17)                                                                                  |
| <i>c</i> / Å                                                     | 14.8064(2)                                                                                                   | 14.6510(2)                                                                                   | 23.9159(15)                                                                                  |
| <i>α</i> / °                                                     | 90                                                                                                           | 90                                                                                           | 90                                                                                           |
| <i>β</i> / °                                                     | 116.901(2)                                                                                                   | 117.565(1)                                                                                   | 147.569(16)                                                                                  |
| <i>γ</i> / °                                                     | 90                                                                                                           | 90                                                                                           | 90                                                                                           |
| Volume / Å <sup>3</sup>                                          | 3711.92(10)                                                                                                  | 3330.27(7)                                                                                   | 3235.0(8)                                                                                    |
| <i>Z</i>                                                         | 2                                                                                                            | 2                                                                                            | 2                                                                                            |
| <i>R</i> <sub>int</sub>                                          | 0.0566                                                                                                       | 0.0470                                                                                       | 0.0496                                                                                       |
| <i>R</i> <sub>1</sub> [ <i>I</i> > 2σ( <i>I</i> )] <sup>a</sup>  | 0.0337                                                                                                       | 0.0243                                                                                       | 0.0268                                                                                       |
| <i>wR</i> <sub>2</sub> [ <i>I</i> > 2σ( <i>I</i> )] <sup>b</sup> | 0.0881                                                                                                       | 0.0597                                                                                       | 0.0694                                                                                       |
| <i>R</i> <sub>1</sub> (all data)                                 | 0.0337                                                                                                       | 0.0243                                                                                       | 0.0268                                                                                       |
| <i>wR</i> <sub>2</sub> (all data)                                | 0.0887                                                                                                       | 0.0610                                                                                       | 0.0706                                                                                       |
| GOF                                                              | 1.061                                                                                                        | 1.038                                                                                        | 1.050                                                                                        |

**Table S2.** Crystallographic data and structural refinement parameters.

| Compounds                                                        | CuIDPO·CO <sub>2</sub>                                                                            | CuIDPO·CO <sub>2</sub>                                                                           | CuIDPO·CH <sub>3</sub> CN                                                                                   |
|------------------------------------------------------------------|---------------------------------------------------------------------------------------------------|--------------------------------------------------------------------------------------------------|-------------------------------------------------------------------------------------------------------------|
| Formula                                                          | C <sub>73.6</sub> H <sub>56</sub> Cu <sub>2</sub> I <sub>2</sub> O <sub>5.12</sub> P <sub>4</sub> | C <sub>72.8</sub> H <sub>56</sub> Cu <sub>2</sub> I <sub>2</sub> O <sub>3.6</sub> P <sub>4</sub> | C <sub>80</sub> H <sub>68</sub> Cu <sub>2</sub> I <sub>2</sub> N <sub>4</sub> O <sub>2</sub> P <sub>4</sub> |
| Formula weight                                                   | 1527                                                                                              | 1493                                                                                             | 1622                                                                                                        |
| <i>T</i> / K                                                     | 150.00(11)                                                                                        | 291.33(10)                                                                                       | 150.00(11)                                                                                                  |
| Crystal system                                                   | monoclinic                                                                                        | monoclinic                                                                                       | monoclinic                                                                                                  |
| Space group                                                      | <i>P</i> 2 <sub>1</sub> / <i>n</i>                                                                | <i>P</i> 2 <sub>1</sub> / <i>c</i>                                                               | <i>P</i> 2 <sub>1</sub> / <i>n</i>                                                                          |
| <i>a</i> / Å                                                     | 13.3073(1)                                                                                        | 13.4567(1)                                                                                       | 13.3463(5)                                                                                                  |
| <i>b</i> / Å                                                     | 19.2892(1)                                                                                        | 19.3380(1)                                                                                       | 20.2060(4)                                                                                                  |
| <i>c</i> / Å                                                     | 14.7456(2)                                                                                        | 14.8468(2)                                                                                       | 14.7519(5)                                                                                                  |
| <i>α</i> / °                                                     | 90                                                                                                | 90                                                                                               | 90                                                                                                          |
| <i>β</i> / °                                                     | 116.688(1)                                                                                        | 116.934(1)                                                                                       | 116.536(4)                                                                                                  |
| <i>γ</i> / °                                                     | 90                                                                                                | 90                                                                                               | 90                                                                                                          |
| Volume / Å <sup>3</sup>                                          | 3381.77(6)                                                                                        | 3444.44(6)                                                                                       | 3559.1(2)                                                                                                   |
| <i>Z</i>                                                         | 2                                                                                                 | 2                                                                                                | 2                                                                                                           |
| <i>R</i> <sub>int</sub>                                          | 0.0343                                                                                            | 0.0377                                                                                           | 0.0486                                                                                                      |
| <i>R</i> <sub>1</sub> [ <i>I</i> > 2σ( <i>I</i> )] <sup>a</sup>  | 0.0277                                                                                            | 0.0269                                                                                           | 0.0355                                                                                                      |
| <i>wR</i> <sub>2</sub> [ <i>I</i> > 2σ( <i>I</i> )] <sup>b</sup> | 0.0673                                                                                            | 0.0726                                                                                           | 0.0948                                                                                                      |
| <i>R</i> <sub>1</sub> (all data)                                 | 0.0277                                                                                            | 0.0269                                                                                           | 0.0355                                                                                                      |
| <i>wR</i> <sub>2</sub> (all data)                                | 0.0679                                                                                            | 0.0738                                                                                           | 0.0967                                                                                                      |
| GOF                                                              | 1.149                                                                                             | 1.066                                                                                            | 1.050                                                                                                       |

<sup>a</sup> $R_1 = \sum ||F_o| - |F_c|| / \sum |F_o|$

<sup>b</sup> $wR_2 = [\sum w(F_o^2 - F_c^2)^2 / \sum w(F_o^2)^2]^{1/2}$

**Table S3.** The main bond lengths (Å) of crystals.

| Compounds | CuIDPO·<br>CH <sub>2</sub> Cl <sub>2</sub><br>(150 K) | CuIDPO<br>(291 K) | CuIDPO<br>(150 K) | CuIDPO·<br>CO <sub>2</sub><br>(150 K) | CuIDPO·<br>CO <sub>2</sub><br>(291 K) | CuIDPO·<br>CH <sub>3</sub> CN<br>(150 K) |
|-----------|-------------------------------------------------------|-------------------|-------------------|---------------------------------------|---------------------------------------|------------------------------------------|
| Cu–Cu / Å | 3.552                                                 | 3.381             | 3.313             | 3.515                                 | 3.534                                 | 3.648                                    |
| Cu–I / Å  | 2.642                                                 | 2.687             | 2.683             | 2.660                                 | 2.673                                 | 2.651                                    |
| Cu–P1 / Å | 2.294                                                 | 2.304             | 2.296             | 2.283                                 | 2.292                                 | 2.288                                    |
| Cu–P2 / Å | 2.283                                                 | 2.290             | 2.279             | 2.268                                 | 2.278                                 | 2.275                                    |

**Table S4.** The binding energy of  $\pi$ – $\pi$  and C–H $\cdots$  $\pi$  interaction, evaluated by DFT calculations.

|                                                                                                                    | DFT-D3 (Hartree) |
|--------------------------------------------------------------------------------------------------------------------|------------------|
| CO <sub>2</sub><br>               | –188.5583        |
| Benzene<br>                       | –232.2650        |
| CO <sub>2</sub> + Benzene<br>   | –420.8286        |
| $\Delta E = E_{\text{Guest+Benzene}} - (E_{\text{Guest}} + E_{\text{Benzene}})$                                    | –0.0053          |
| CH <sub>3</sub> CN<br>          | –132.7534        |
| Benzene<br>                     | –232.2656        |
| CH <sub>3</sub> CN+ Benzene<br> | –365.0251        |
| $\Delta E = E_{\text{Guest+Benzene}} - (E_{\text{Guest}} + E_{\text{Benzene}})$                                    | –0.0061          |

**Table S5.** The atomic coordinates of the ground state of CuIDPO in the computational results.

| Tag | Element | x          | y          | z          |
|-----|---------|------------|------------|------------|
| 1   | I       | -0.1069170 | -0.0569030 | -2.0813620 |
| 2   | Cu      | 1.6287220  | -0.0444560 | -0.0633350 |
| 3   | P       | 2.4417390  | 2.1661670  | -0.0582750 |
| 4   | P       | 3.2995340  | -1.6858520 | -0.0052500 |
| 5   | O       | 4.2856980  | 0.4628670  | 1.6040860  |
| 6   | C       | 3.6836150  | 2.4688570  | -1.3714990 |
| 7   | C       | 1.2317550  | 3.5258650  | -0.2598980 |
| 8   | C       | 4.5522340  | 3.5693660  | -1.3319610 |
| 9   | H       | 4.4986630  | 4.2685320  | -0.5015130 |
| 10  | C       | 3.3284970  | 2.6710000  | 1.4761750  |
| 11  | C       | 5.1905630  | 0.2534170  | 0.5806950  |
| 12  | C       | 4.9123980  | -0.8487080 | -0.2421580 |
| 13  | C       | 4.1438430  | 1.7343880  | 2.1314400  |
| 14  | C       | 3.4880290  | -2.5783130 | 1.5775560  |
| 15  | C       | 3.1974910  | 3.9391370  | 2.0608960  |
| 16  | H       | 2.5681430  | 4.6821670  | 1.5813750  |
| 17  | C       | 3.7668730  | 1.5631570  | -2.4353070 |
| 18  | H       | 3.0987890  | 0.7059780  | -2.4586340 |
| 19  | C       | 5.4871760  | 3.7605890  | -2.3462770 |
| 20  | H       | 6.1576110  | 4.6148710  | -2.3096340 |
| 21  | C       | 0.2581970  | 3.7092500  | 0.7362340  |
| 22  | H       | 0.2101300  | 3.0270680  | 1.5806460  |
| 23  | C       | 5.8069230  | -1.1438230 | -1.2762970 |
| 24  | H       | 5.6076180  | -1.9923480 | -1.9236150 |
| 25  | C       | 3.8413790  | 4.2489000  | 3.2592860  |
| 26  | H       | 3.7211820  | 5.2371440  | 3.6931220  |
| 27  | C       | 3.3659530  | -3.0039250 | -1.2732520 |
| 28  | C       | 4.7768330  | 2.0248250  | 3.3357950  |
| 29  | H       | 5.3744520  | 1.2527580  | 3.8099750  |
| 30  | C       | 7.1696050  | 0.7585550  | -0.6799090 |
| 31  | H       | 8.0319540  | 1.3942660  | -0.8575860 |
| 32  | C       | 4.7376700  | -2.8059040 | 2.1706930  |
| 33  | H       | 5.6399030  | -2.4382480 | 1.6886490  |
| 34  | C       | 5.5652500  | 2.8526620  | -3.4060730 |
| 35  | H       | 6.2990510  | 2.9994990  | -4.1937610 |
| 36  | C       | 4.7054100  | 1.7555450  | -3.4495140 |
| 37  | H       | 4.7680570  | 1.0425170  | -4.2664000 |
| 38  | C       | 4.6233690  | 3.2897480  | 3.9034570  |
| 39  | H       | 5.1132680  | 3.5218950  | 4.8444120  |
| 40  | C       | -0.6326920 | 4.7776800  | 0.6582950  |
| 41  | H       | -1.3628960 | 4.9235490  | 1.4466610  |
| 42  | C       | 6.3045280  | 1.0604300  | 0.3727440  |
| 43  | H       | 6.4789600  | 1.9184340  | 1.0136210  |
| 44  | C       | 1.2617810  | 4.3953880  | -1.3583530 |
| 45  | H       | 2.0046360  | 4.2579370  | -2.1378500 |
| 46  | C       | 4.0467730  | -4.2101910 | -1.0588550 |
| 47  | H       | 4.5335470  | -4.3916840 | -0.1046540 |
| 48  | C       | 2.3272990  | -3.0470560 | 2.2045780  |
| 49  | H       | 1.3558430  | -2.8636070 | 1.7569280  |
| 50  | C       | 2.7217310  | -2.7838000 | -2.4972850 |
| 51  | H       | 2.1627200  | -1.8652250 | -2.6509990 |
| 52  | C       | 6.9294500  | -0.3448530 | -1.4979270 |
| 53  | H       | 7.6067050  | -0.5788430 | -2.3136420 |

|     |    |            |            |            |
|-----|----|------------|------------|------------|
| 54  | C  | 3.4359430  | -4.9577240 | -3.2777880 |
| 55  | H  | 3.4552420  | -5.7203820 | -4.0512710 |
| 56  | C  | 4.0809520  | -5.1820250 | -2.0581450 |
| 57  | H  | 4.6043160  | -6.1179660 | -1.8830080 |
| 58  | C  | 4.8224670  | -3.4957750 | 3.3795310  |
| 59  | H  | 5.7935560  | -3.6666450 | 3.8364140  |
| 60  | C  | 2.7573250  | -3.7570270 | -3.4965300 |
| 61  | H  | 2.2399810  | -3.5828440 | -4.4356150 |
| 62  | C  | -0.5919200 | 5.6465910  | -0.4337620 |
| 63  | H  | -1.3003110 | 6.4671490  | -0.5000470 |
| 64  | C  | 0.3482310  | 5.4476330  | -1.4445730 |
| 65  | H  | 0.3779770  | 6.1147140  | -2.3016860 |
| 66  | C  | 2.4175970  | -3.7407310 | 3.4105220  |
| 67  | H  | 1.5094840  | -4.0966170 | 3.8874050  |
| 68  | C  | 3.6619430  | -3.9633950 | 4.0012130  |
| 69  | H  | 3.7290960  | -4.4963950 | 4.9457850  |
| 70  | I  | 0.0550520  | -0.0188370 | 2.1097210  |
| 71  | Cu | -1.6805880 | -0.0312830 | 0.0916940  |
| 72  | P  | -2.4871480 | -2.2280650 | 0.0696100  |
| 73  | P  | -3.3120230 | 1.7051890  | -0.0452900 |
| 74  | O  | -4.1526360 | -0.4473950 | -1.6703720 |
| 75  | C  | -3.6502690 | -2.4817990 | 1.4579540  |
| 76  | C  | -1.1869960 | -3.4911050 | 0.3358890  |
| 77  | C  | -4.5208520 | -3.5930720 | 1.4499260  |
| 78  | H  | -4.4041850 | -4.3588270 | 0.6870600  |
| 79  | C  | -3.2148870 | -2.6753420 | -1.4819510 |
| 80  | C  | -5.1221120 | -0.2444030 | -0.7176210 |
| 81  | C  | -4.9310700 | 0.8845470  | 0.0985750  |
| 82  | C  | -4.0360990 | -1.7485260 | -2.1966380 |
| 83  | C  | -3.3728760 | 2.6354060  | -1.6163830 |
| 84  | C  | -3.3020830 | -4.0468040 | -1.9314630 |
| 85  | H  | -2.7418220 | -4.8130240 | -1.4050780 |
| 86  | C  | -3.8526540 | -1.4735810 | 2.4189510  |
| 87  | H  | -3.1988450 | -0.6053540 | 2.4268110  |
| 88  | C  | -5.5382510 | -3.6967070 | 2.3905100  |
| 89  | H  | -6.1942800 | -4.5636090 | 2.3772290  |
| 90  | C  | -0.2819830 | -3.7752780 | -0.6983280 |
| 91  | H  | -0.3337870 | -3.2084730 | -1.6235400 |
| 92  | C  | -5.8972020 | 1.2045140  | 1.0585350  |
| 93  | H  | -5.7521950 | 2.0744480  | 1.6922490  |
| 94  | C  | -4.0252380 | -4.3793080 | -3.0624590 |
| 95  | H  | -4.0289450 | -5.4159150 | -3.3930010 |
| 96  | C  | -3.4025980 | 3.0051180  | 1.2411370  |
| 97  | C  | -4.7466620 | -2.0766950 | -3.3220190 |
| 98  | H  | -5.3330710 | -1.3038420 | -3.8106070 |
| 99  | C  | -7.1710230 | -0.7452780 | 0.4354340  |
| 100 | H  | -8.0261350 | -1.3987750 | 0.5826010  |
| 101 | C  | -4.5749140 | 2.8608250  | -2.2996970 |
| 102 | H  | -5.5040070 | 2.4645230  | -1.8987340 |
| 103 | C  | -5.7239710 | -2.6922420 | 3.3507850  |
| 104 | H  | -6.5266620 | -2.7726430 | 4.0783350  |
| 105 | C  | -4.8779850 | -1.5804640 | 3.3549160  |
| 106 | H  | -5.0188300 | -0.7903270 | 4.0881010  |
| 107 | C  | -4.7280200 | -3.4131890 | -3.8074670 |
| 108 | H  | -5.2770250 | -3.6815900 | -4.7025500 |
| 109 | C  | 0.6437760  | -4.8073830 | -0.5583180 |
| 110 | H  | 1.3239750  | -5.0320840 | -1.3731970 |

|     |   |            |            |            |
|-----|---|------------|------------|------------|
| 111 | C | -6.2344820 | -1.0680820 | -0.5446250 |
| 112 | H | -6.3432300 | -1.9528890 | -1.1617730 |
| 113 | C | -1.1228250 | -4.2308090 | 1.5253360  |
| 114 | H | -1.8228940 | -4.0164050 | 2.3271230  |
| 115 | C | -4.0246200 | 4.2400590  | 1.0121120  |
| 116 | H | -4.4540660 | 4.4520290  | 0.0369030  |
| 117 | C | -2.1732040 | 3.1289930  | -2.1435160 |
| 118 | H | -1.2369160 | 2.9402560  | -1.6280870 |
| 119 | C | -2.8378140 | 2.7418040  | 2.4961320  |
| 120 | H | -2.3349240 | 1.7944510  | 2.6702570  |
| 121 | C | -7.0191170 | 0.3948860  | 1.2270540  |
| 122 | H | -7.7576010 | 0.6408900  | 1.9839990  |
| 123 | C | -3.5080290 | 4.9320260  | 3.2728310  |
| 124 | H | -3.5437520 | 5.6821220  | 4.0580940  |
| 125 | C | -4.0767000 | 5.1985070  | 2.0240700  |
| 126 | H | -4.5576920 | 6.1548680  | 1.8375470  |
| 127 | C | -4.5750940 | 3.5784140  | -3.4956530 |
| 128 | H | -5.5096470 | 3.7441850  | -4.0245180 |
| 129 | C | -2.8903970 | 3.7013590  | 3.5079290  |
| 130 | H | -2.4405690 | 3.4899950  | 4.4739790  |
| 131 | C | 0.6911370  | -5.5527690 | 0.6216960  |
| 132 | H | 1.4174360  | -6.3535630 | 0.7296080  |
| 133 | C | -0.1907050 | -5.2599570 | 1.6630330  |
| 134 | H | -0.1599590 | -5.8382910 | 2.5827300  |
| 135 | C | -2.1784180 | 3.8499410  | -3.3362630 |
| 136 | H | -1.2407910 | 4.2232630  | -3.7373170 |
| 137 | C | -3.3772190 | 4.0742640  | -4.0150180 |
| 138 | H | -3.3784630 | 4.6265970  | -4.9508780 |

**Table S6.** The atomic coordinates of the excited triplet state of CuLDPO in the computational results.

| Tag | Element | x          | y          | z          |
|-----|---------|------------|------------|------------|
| 1   | I       | -0.1069770 | -0.0569530 | -2.0814000 |
| 2   | Cu      | 1.6286610  | -0.0445060 | -0.0633730 |
| 3   | P       | 2.4416780  | 2.1661180  | -0.0583130 |
| 4   | P       | 3.2994730  | -1.6859020 | -0.0052880 |
| 5   | O       | 4.2856370  | 0.4628180  | 1.6040480  |
| 6   | C       | 3.6835540  | 2.4688080  | -1.3715370 |
| 7   | C       | 1.2316940  | 3.5258160  | -0.2599360 |
| 8   | C       | 4.5521720  | 3.5693170  | -1.3319990 |
| 9   | H       | 4.4980660  | 4.2686100  | -0.5016350 |
| 10  | C       | 3.3284350  | 2.6709510  | 1.4761370  |
| 11  | C       | 5.1905020  | 0.2533680  | 0.5806570  |
| 12  | C       | 4.9123380  | -0.8487570 | -0.2421960 |
| 13  | C       | 4.1437820  | 1.7343390  | 2.1314020  |
| 14  | C       | 3.4879690  | -2.5783620 | 1.5775180  |
| 15  | C       | 3.1974290  | 3.9390880  | 2.0608580  |
| 16  | H       | 2.5689790  | 4.6823620  | 1.5804910  |
| 17  | C       | 3.7668120  | 1.5631070  | -2.4353450 |
| 18  | H       | 3.0958130  | 0.7081490  | -2.4586350 |
| 19  | C       | 5.4871140  | 3.7605400  | -2.3463150 |
| 20  | H       | 6.1582270  | 4.6144620  | -2.3098350 |
| 21  | C       | 0.2581350  | 3.7092000  | 0.7361960  |
| 22  | H       | 0.2118840  | 3.0270880  | 1.5808310  |
| 23  | C       | 5.8068630  | -1.1438720 | -1.2763350 |
| 24  | H       | 5.6077220  | -1.9922630 | -1.9238960 |

|    |    |            |            |            |
|----|----|------------|------------|------------|
| 25 | C  | 3.8413170  | 4.2488510  | 3.2592480  |
| 26 | H  | 3.7217840  | 5.2372350  | 3.6932390  |
| 27 | C  | 3.3658930  | -3.0039740 | -1.2732900 |
| 28 | C  | 4.7767720  | 2.0247760  | 3.3357570  |
| 29 | H  | 5.3745140  | 1.2528000  | 3.8100450  |
| 30 | C  | 7.1695440  | 0.7585070  | -0.6799470 |
| 31 | H  | 8.0315500  | 1.3946030  | -0.8580740 |
| 32 | C  | 4.7376100  | -2.8059530 | 2.1706550  |
| 33 | H  | 5.6395510  | -2.4378180 | 1.6884540  |
| 34 | C  | 5.5651880  | 2.8526130  | -3.4061110 |
| 35 | H  | 6.2990310  | 2.9996350  | -4.1938720 |
| 36 | C  | 4.7053480  | 1.7554960  | -3.4495520 |
| 37 | H  | 4.7678010  | 1.0426910  | -4.2667650 |
| 38 | C  | 4.6233070  | 3.2896990  | 3.9034190  |
| 39 | H  | 5.1136320  | 3.5219760  | 4.8442020  |
| 40 | C  | -0.6327540 | 4.7776290  | 0.6582570  |
| 41 | H  | -1.3622460 | 4.9245660  | 1.4471360  |
| 42 | C  | 6.3044670  | 1.0603810  | 0.3727060  |
| 43 | H  | 6.4780790  | 1.9188690  | 1.0131280  |
| 44 | C  | 1.2617190  | 4.3953380  | -1.3583910 |
| 45 | H  | 2.0052300  | 4.2577870  | -2.1372360 |
| 46 | C  | 4.0467130  | -4.2102400 | -1.0588930 |
| 47 | H  | 4.5346950  | -4.3910490 | -0.1051270 |
| 48 | C  | 2.3272400  | -3.0471050 | 2.2045400  |
| 49 | H  | 1.3560170  | -2.8580200 | 1.7588050  |
| 50 | C  | 2.7216710  | -2.7838500 | -2.4973230 |
| 51 | H  | 2.1622570  | -1.8647790 | -2.6496730 |
| 52 | C  | 6.9293890  | -0.3449010 | -1.4979650 |
| 53 | H  | 7.6063610  | -0.5784480 | -2.3141090 |
| 54 | C  | 3.4358830  | -4.9577740 | -3.2778260 |
| 55 | H  | 3.4562570  | -5.7201710 | -4.0516780 |
| 56 | C  | 4.0808930  | -5.1820740 | -2.0581830 |
| 57 | H  | 4.6054310  | -6.1176000 | -1.8837620 |
| 58 | C  | 4.8224080  | -3.4958230 | 3.3794930  |
| 59 | H  | 5.7933910  | -3.6663570 | 3.8368430  |
| 60 | C  | 2.7572650  | -3.7570760 | -3.4965680 |
| 61 | H  | 2.2408680  | -3.5822080 | -4.4361320 |
| 62 | C  | -0.5919830 | 5.6465400  | -0.4338000 |
| 63 | H  | -1.2995400 | 6.4680190  | -0.4995610 |
| 64 | C  | 0.3481690  | 5.4475830  | -1.4446110 |
| 65 | H  | 0.3779620  | 6.1152530  | -2.3014260 |
| 66 | C  | 2.4175370  | -3.7407810 | 3.4104840  |
| 67 | H  | 1.5094810  | -4.0948120 | 3.8891190  |
| 68 | C  | 3.6618840  | -3.9634440 | 4.0011750  |
| 69 | H  | 3.7290190  | -4.4960360 | 4.9460430  |
| 70 | I  | 0.0549910  | -0.0188870 | 2.1096830  |
| 71 | Cu | -1.6806490 | -0.0313340 | 0.0916560  |
| 72 | P  | -2.4872080 | -2.2281160 | 0.0695720  |
| 73 | P  | -3.3120840 | 1.7051380  | -0.0453280 |
| 74 | O  | -4.1526970 | -0.4474460 | -1.6704100 |
| 75 | C  | -3.6503290 | -2.4818500 | 1.4579160  |
| 76 | C  | -1.1870560 | -3.4911560 | 0.3358510  |
| 77 | C  | -4.5209120 | -3.5931240 | 1.4498880  |
| 78 | H  | -4.3992920 | -4.3646560 | 0.6939500  |
| 79 | C  | -3.2149470 | -2.6753930 | -1.4819890 |
| 80 | C  | -5.1221730 | -0.2444550 | -0.7176590 |
| 81 | C  | -4.9311310 | 0.8844950  | 0.0985370  |



|     |   |            |            |            |
|-----|---|------------|------------|------------|
| 82  | C | -4.0361590 | -1.7485780 | -2.1966760 |
| 83  | C | -3.3729370 | 2.6353550  | -1.6164210 |
| 84  | C | -3.3021430 | -4.0468560 | -1.9315010 |
| 85  | H | -2.7435090 | -4.8121940 | -1.4017060 |
| 86  | C | -3.8527140 | -1.4736320 | 2.4189130  |
| 87  | H | -3.1951230 | -0.6074210 | 2.4277870  |
| 88  | C | -5.5383110 | -3.6967590 | 2.3904720  |
| 89  | H | -6.1904470 | -4.5665640 | 2.3792720  |
| 90  | C | -0.2820430 | -3.7753290 | -0.6983660 |
| 91  | H | -0.3240600 | -3.1951480 | -1.6165930 |
| 92  | C | -5.8972630 | 1.2044620  | 1.0584970  |
| 93  | H | -5.7520540 | 2.0752020  | 1.6909930  |
| 94  | C | -4.0252980 | -4.3793600 | -3.0624970 |
| 95  | H | -4.0380050 | -5.4178710 | -3.3860310 |
| 96  | C | -3.4026600 | 3.0050670  | 1.2410990  |
| 97  | C | -4.7467220 | -2.0767460 | -3.3220570 |
| 98  | H | -5.3308770 | -1.3030240 | -3.8120100 |
| 99  | C | -7.1710840 | -0.7453310 | 0.4353960  |
| 100 | H | -8.0266140 | -1.3983670 | 0.5819680  |
| 101 | C | -4.5749760 | 2.8607740  | -2.2997350 |
| 102 | H | -5.5047170 | 2.4661280  | -1.8983250 |
| 103 | C | -5.7240310 | -2.6922940 | 3.3507470  |
| 104 | H | -6.5265120 | -2.7732700 | 4.0784360  |
| 105 | C | -4.8780450 | -1.5805150 | 3.3548780  |
| 106 | H | -5.0164210 | -0.7915990 | 4.0897380  |
| 107 | C | -4.7280800 | -3.4132400 | -3.8075050 |
| 108 | H | -5.2714840 | -3.6802960 | -4.7068850 |
| 109 | C | 0.6437160  | -4.8074330 | -0.5583560 |
| 110 | H | 1.3283630  | -5.0277890 | -1.3705900 |
| 111 | C | -6.2345430 | -1.0681340 | -0.5446630 |
| 112 | H | -6.3454860 | -1.9533930 | -1.1610900 |
| 113 | C | -1.1228850 | -4.2308590 | 1.5252980  |
| 114 | H | -1.8203630 | -4.0130160 | 2.3284170  |
| 115 | C | -4.0246820 | 4.2400070  | 1.0120740  |
| 116 | H | -4.4526050 | 4.4528530  | 0.0363750  |
| 117 | C | -2.1732660 | 3.1289420  | -2.1435540 |
| 118 | H | -1.2361120 | 2.9380750  | -1.6302970 |
| 119 | C | -2.8378750 | 2.7417520  | 2.4960940  |
| 120 | H | -2.3312900 | 1.7957640  | 2.6689820  |
| 121 | C | -7.0191770 | 0.3948330  | 1.2270160  |
| 122 | H | -7.7582840 | 0.6410050  | 1.9832590  |
| 123 | C | -3.5080910 | 4.9319750  | 3.2727930  |
| 124 | H | -3.5433360 | 5.6823490  | 4.0578170  |
| 125 | C | -4.0767630 | 5.1984550  | 2.0240320  |
| 126 | H | -4.5571660 | 6.1549820  | 1.8369740  |
| 127 | C | -4.5751560 | 3.5783630  | -3.4956910 |
| 128 | H | -5.5100130 | 3.7450200  | -4.0238800 |
| 129 | C | -2.8904590 | 3.7013080  | 3.5078910  |
| 130 | H | -2.4391920 | 3.4901890  | 4.4732790  |
| 131 | C | 0.6910780  | -5.5528190 | 0.6216580  |
| 132 | H | 1.4208210  | -6.3501200 | 0.7313300  |
| 133 | C | -0.1907640 | -5.2600070 | 1.6629950  |
| 134 | H | -0.1592720 | -5.8373130 | 2.5831780  |
| 135 | C | -2.1784800 | 3.8498900  | -3.3363010 |
| 136 | H | -1.2404650 | 4.2224310  | -3.7368480 |
| 137 | C | -3.3772810 | 4.0742130  | -4.0150560 |
| 138 | H | -3.3786710 | 4.6269740  | -4.9506830 |

**Table S7.** The atomic coordinates of CO<sub>2</sub>, benzene and CO<sub>2</sub> + benzene in the computational results.

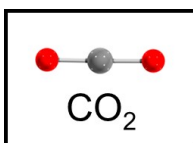

| Tag | Element | x          | y          | z         |
|-----|---------|------------|------------|-----------|
| 1   | O       | 1.1679610  | 0.1173050  | 0.0000000 |
| 2   | O       | -1.1679610 | -0.1315560 | 0.0000000 |
| 3   | C       | 0.0000000  | 0.0190010  | 0.0000000 |

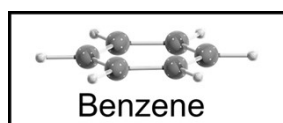

| Tag | Element | x          | y          | z          |
|-----|---------|------------|------------|------------|
| 1   | C       | 0.7782930  | 1.1419840  | -0.0142930 |
| 2   | H       | 1.3851280  | 2.0498550  | -0.0211770 |
| 3   | C       | 1.3911540  | -0.1059710 | 0.0149100  |
| 4   | C       | -0.6042230 | 1.2380930  | -0.0019700 |
| 5   | H       | -1.0765590 | 2.2224230  | -0.0012420 |
| 6   | C       | -1.3800320 | 0.1021560  | 0.0149450  |
| 7   | H       | -2.4690660 | 0.1851950  | 0.0283730  |
| 8   | C       | 0.5978090  | -1.2383040 | -0.0007360 |
| 9   | H       | 1.0649930  | -2.2254130 | -0.0051760 |
| 10  | C       | -0.7816700 | -1.1378020 | -0.0134490 |
| 11  | H       | -1.3916940 | -2.0429500 | -0.0245750 |
| 12  | H       | 2.4792130  | -0.1900510 | 0.0273550  |

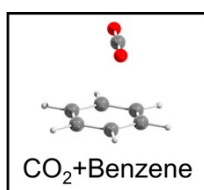

| Tag | Element | x          | y          | z          |
|-----|---------|------------|------------|------------|
| 1   | O       | 1.8533240  | -1.4425100 | -0.2303970 |
| 2   | O       | 2.8285210  | 0.6769350  | 0.0442100  |
| 3   | C       | 2.3329390  | -0.3853870 | -0.0683530 |
| 4   | C       | -0.8178720 | 0.5773850  | 1.3111340  |
| 5   | H       | -0.4960200 | 0.8851850  | 2.3082280  |
| 6   | C       | -1.5253400 | -0.6078080 | 1.1418680  |
| 7   | C       | -0.5473210 | 1.3875500  | 0.2197260  |
| 8   | H       | -0.0118700 | 2.3278040  | 0.3654120  |
| 9   | C       | -0.9544170 | 1.0151970  | -1.0404900 |
| 10  | H       | -0.7411460 | 1.6602790  | -1.8957430 |
| 11  | C       | -1.8994370 | -0.9838090 | -0.1350400 |
| 12  | H       | -2.4320610 | -1.9250270 | -0.2869810 |
| 13  | C       | -1.6055950 | -0.1841230 | -1.2247110 |
| 14  | H       | -1.9099740 | -0.4969030 | -2.2252440 |
| 15  | H       | -1.7614330 | -1.2407680 | 1.9990250  |

**Table S8.** The atomic coordinates of CH<sub>3</sub>CN, benzene and CH<sub>3</sub>CN + benzene in the computational results.

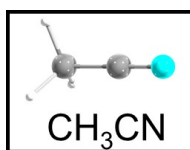

| Tag | Element | x          | y          | z          |
|-----|---------|------------|------------|------------|
| 1   | H       | -1.5478060 | 0.9987520  | -0.2598130 |
| 2   | H       | -1.5566640 | -0.2722260 | 0.9928310  |
| 3   | N       | 1.4391850  | 0.0005980  | -0.0006650 |
| 4   | C       | 0.2722750  | -0.0021430 | 0.0016640  |
| 5   | C       | -1.1744360 | 0.0008660  | -0.0009380 |
| 6   | H       | -1.5568570 | -0.7230540 | -0.7327160 |

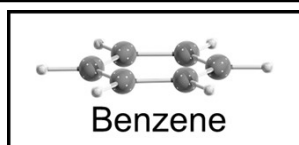

| Tag | Element | x          | y          | z          |
|-----|---------|------------|------------|------------|
| 1   | C       | 0.7556210  | -1.1592090 | 0.0101080  |
| 2   | H       | 1.3449600  | -2.0779670 | 0.0245730  |
| 3   | C       | 1.3927820  | 0.0723910  | -0.0077970 |
| 4   | C       | -0.6295400 | -1.2309840 | -0.0050550 |
| 5   | H       | -1.1228040 | -2.2035960 | 0.0075850  |
| 6   | C       | 0.6267530  | 1.2369120  | -0.0025390 |
| 7   | H       | 1.1146420  | 2.2132930  | -0.0017220 |
| 8   | C       | -1.3855720 | -0.0720500 | -0.0117320 |
| 9   | H       | -2.4749380 | -0.1317520 | -0.0020710 |
| 10  | C       | -0.7587150 | 1.1529180  | 0.0105690  |
| 11  | H       | -1.3525340 | 2.0692260  | 0.0242380  |
| 12  | H       | 2.4826950  | 0.1309230  | -0.0139330 |

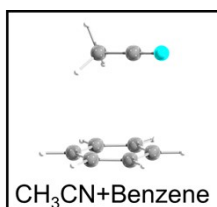

| Tag | Element | x          | y          | z          |
|-----|---------|------------|------------|------------|
| 1   | H       | -0.8384600 | 1.3599200  | -0.1330480 |
| 2   | H       | -2.2140720 | 1.9415020  | 0.8437000  |
| 3   | C       | 1.1495630  | -0.1540100 | 1.4010000  |
| 4   | H       | 1.0698150  | -0.1557240 | 2.4897080  |
| 5   | C       | 1.5437640  | 0.9978840  | 0.7370140  |
| 6   | C       | 0.8694120  | -1.3111290 | 0.6892120  |
| 7   | H       | 0.5615490  | -2.2132370 | 1.2191810  |
| 8   | C       | 1.6183810  | 0.9913230  | -0.6548660 |
| 9   | H       | 1.9130190  | 1.8948400  | -1.1917130 |
| 10  | N       | -2.8981250 | -1.0331770 | -0.0047880 |
| 11  | C       | 0.9563650  | -1.3159010 | -0.6917930 |
| 12  | H       | 0.7146960  | -2.2215830 | -1.2501050 |
| 13  | C       | 1.3086120  | -0.1645180 | -1.3583000 |
| 14  | H       | 1.3599970  | -0.1598190 | -2.4490640 |
| 15  | C       | -2.4699860 | 0.0520460  | -0.0308510 |

|    |   |            |           |            |
|----|---|------------|-----------|------------|
| 16 | C | -1.9323810 | 1.3946720 | -0.0672780 |
| 17 | H | -2.3239840 | 1.9397580 | -0.9363770 |
| 18 | H | 1.7819300  | 1.9043820 | 1.2964010  |

---

### 3. Reference

- [1] H. Yersin, A. F. Rausch, R. Czerwieniec, T. Hofbeck, T. Fischer. The triplet state of organo-transition metal compounds. Triplet harvesting and singlet harvesting for efficient OLEDs. *Coord. Chem. Rev.* **2011**, 255, 2622
- [2] M. J. Frisch, G. W. Trucks, H. B. Schlegel, G. E. Scuseria, M. A. Robb, J. R. Cheeseman, G. Scalmani, V. Barone, B. Mennucci, G. A. Petersson, H. Nakatsuji, M. Caricato, X. Li, H. P. Hratchian, A. F. Izmaylov, J. Bloino, G. Zheng, J. L. Sonnenberg, M. Hada, M. Ehara, K. Toyota, R. Fukuda, J. Hasegawa, M. Ishida, T. Nakajima, Y. Honda, O. Kitao, H. Nakai, T. Vreven, Jr J. A. Montgomery, J. E. Peralta, F. Ogliaro, M. Bearpark, J. J. Heyd, E. Brothers, K. N. Kudin, V. N. Staroverov, R. Kobayashi, J. Normand, K. Raghavachari, A. Rendell, J. C. Burant, S. S. Iyengar, J. Tomasi, M. Cossi, N. Rega, J. M. Millam, M. Klene, J. E. Knox, J. B. Cross, V. Bakken, C. Adamo, J. Jaramillo, R. Gomperts, R. E. Stratmann, O. Yazyev, A. J. Austin, R. Cammi, C. Pomelli, J. W. Ochterski, R. L. Martin, K. Morokuma, V. G. Zakrzewski, G. A. Voth, P. Salvador, J. J. Dannenberg, S. Dapprich, A. D. Daniels, O. Farkas, J. B. Foresman, J. V. Ortiz, J. Cioslowski, D. J. Fox. *Gaussian, Inc.*, Wallingford CT, **2009**.
- [3] C. Adamo, V. Barone. Toward reliable density functional methods without adjustable parameters: The PBE0 model. *J. Chem. Phys.* **1999**, 110, 6158.
- [4] T. Lu, F. Chen. *J. Comput. Chem.* **2012**, 33, 580.
- [5] Humphrey, W.; Dalke, A.; Schulten, K., VMD: Visual Molecular Dynamics. *J. Mol. Graphics Modell.* **1996**, 14, 33-38.
- [6] J. P. Perdew, K. Burke and M. Ernzerhof. Generalized Gradient Approximation Made Simple. *Phys. Rev. Lett.* **1996**, 77, 3865-3868.
- [7] S. Grimme. Semiempirical GGA-type density functional constructed with a long-range dispersion correction. *J. Comput. Chem.* **2006**, 27, 1787-1799.
